# Supplementary material for: Validation of automated lobe segmentation on paired inspiratory-expiratory chest CT in 8-14 year-old children with cystic fibrosis
Source: PubMed Central journal article supplement (PMC5890971; doi:10.1371/journal.pone.0194557), 2018-04-09

**RUL B30f**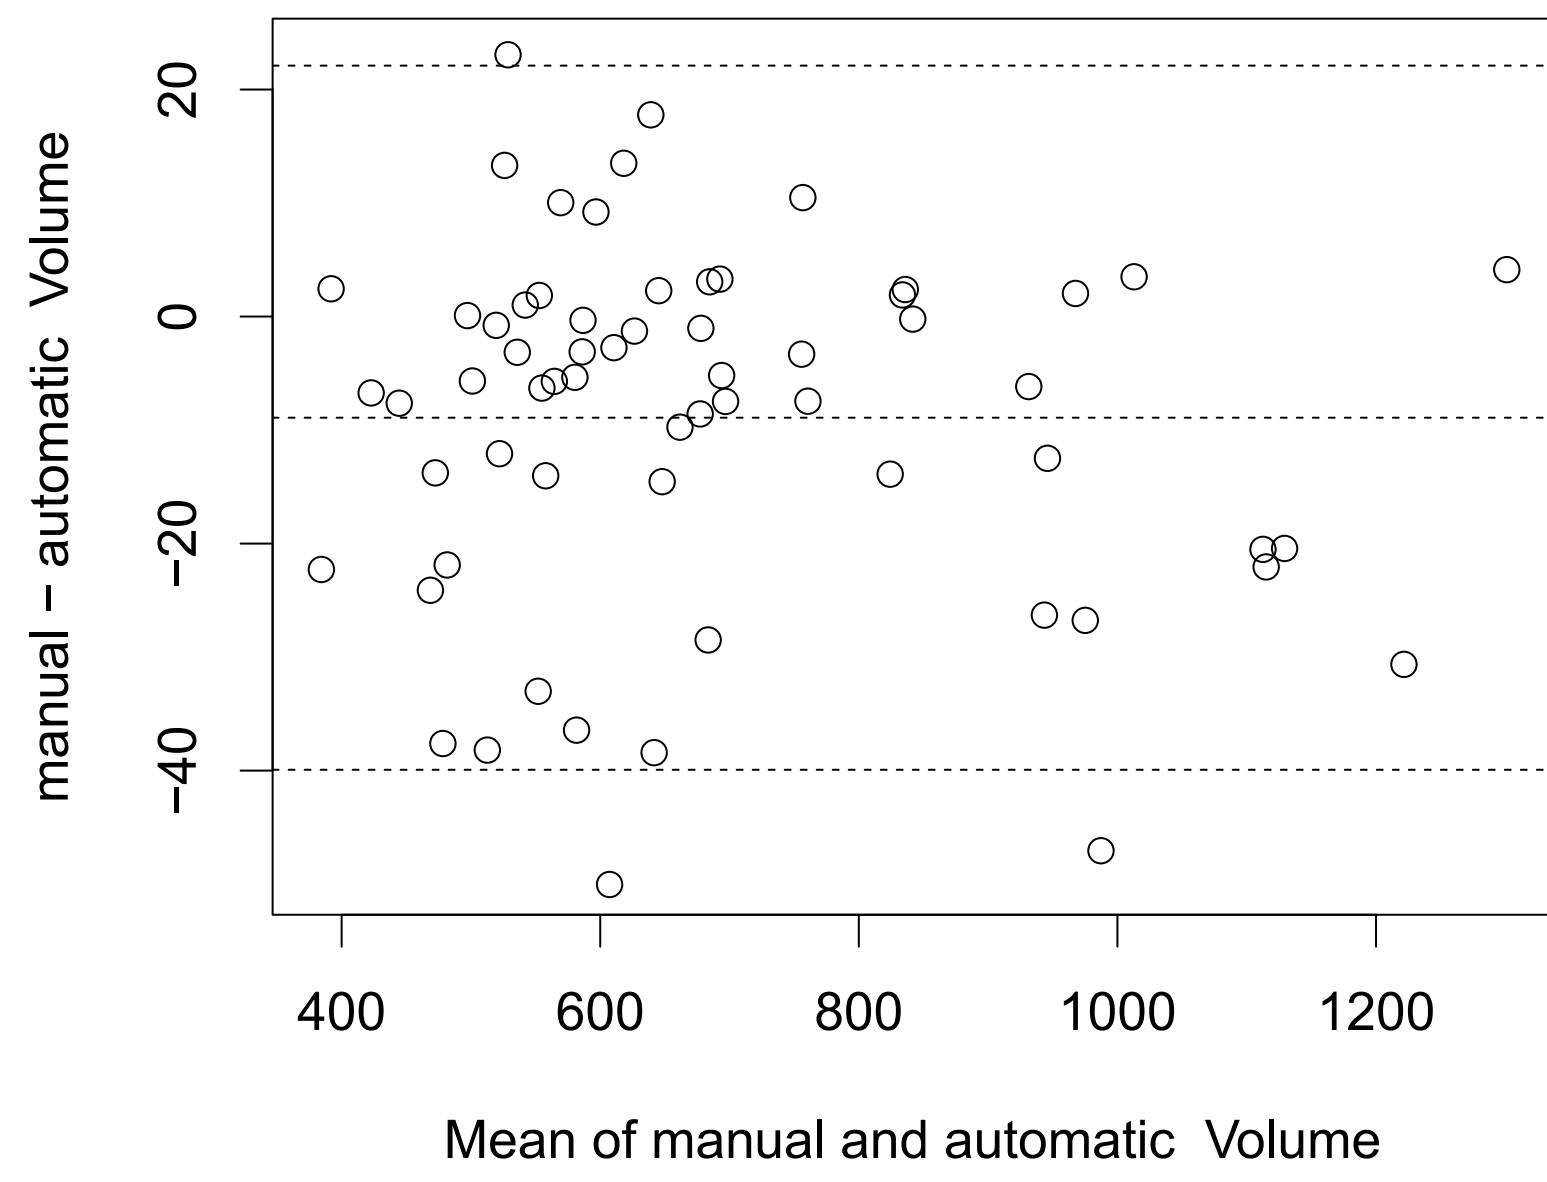**RML B30f**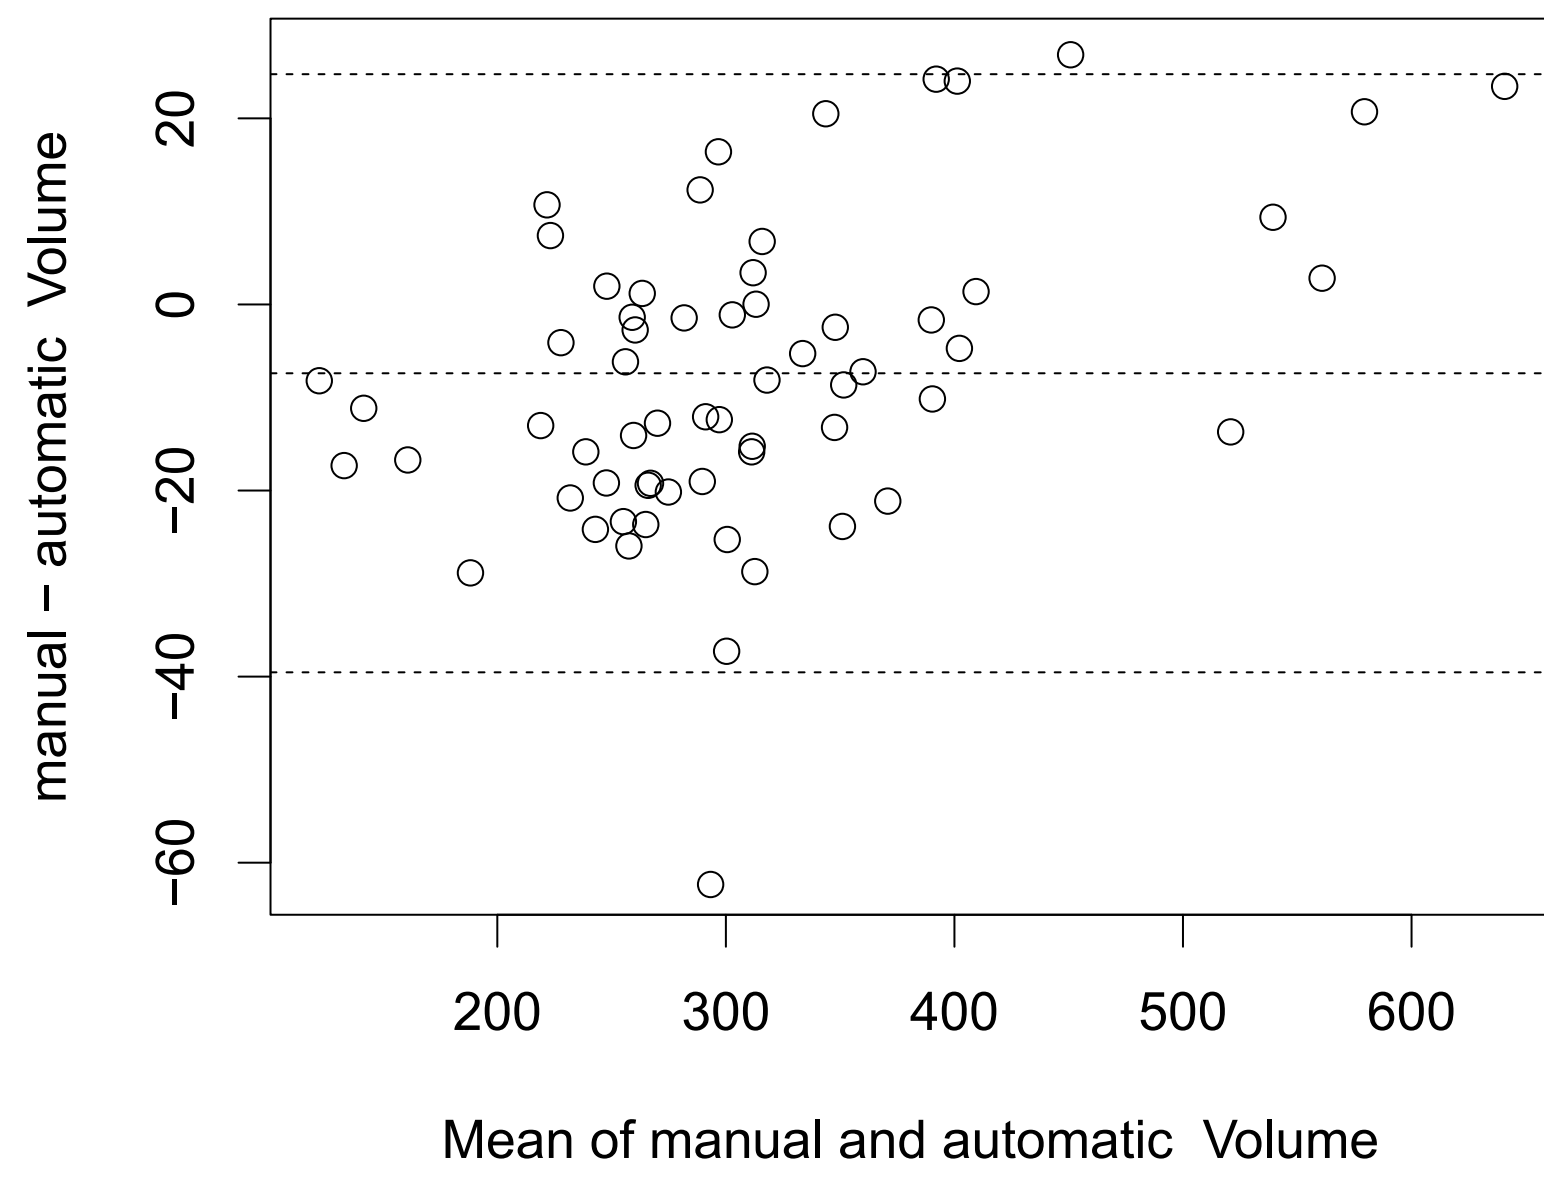**RLL B30f**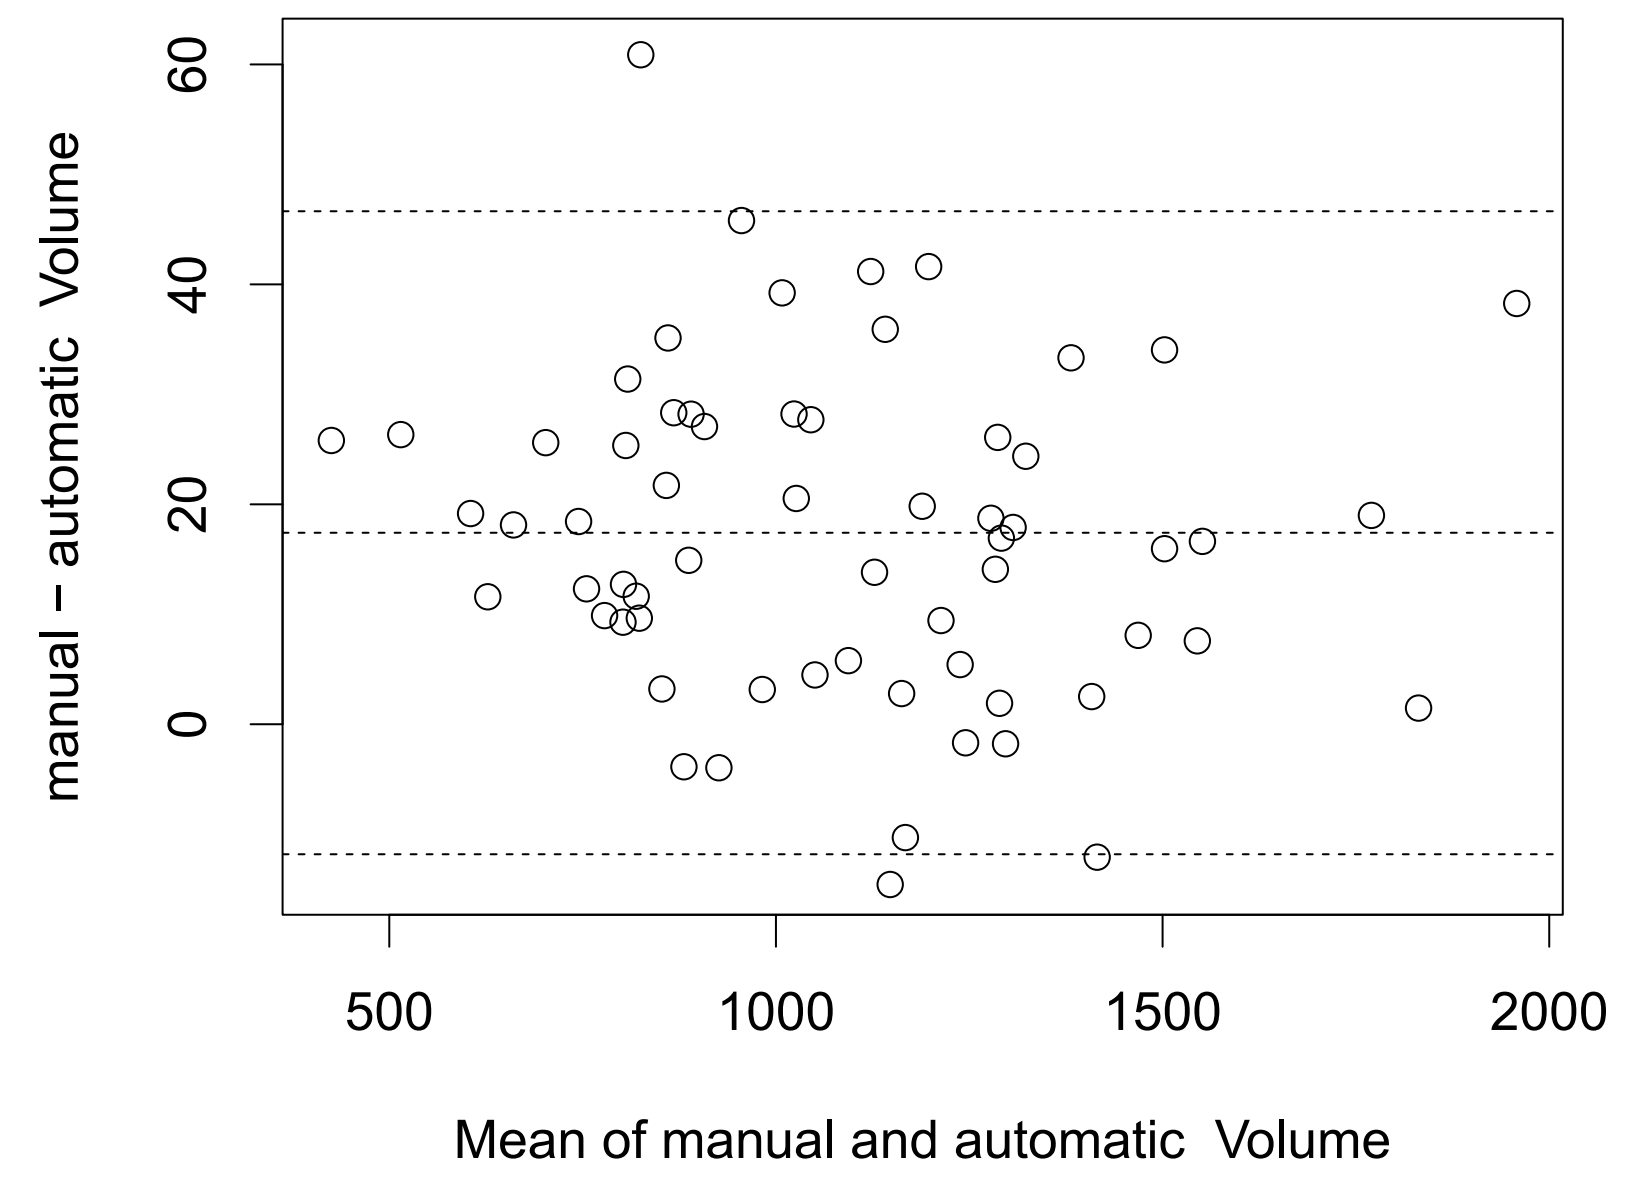**LUL B30f**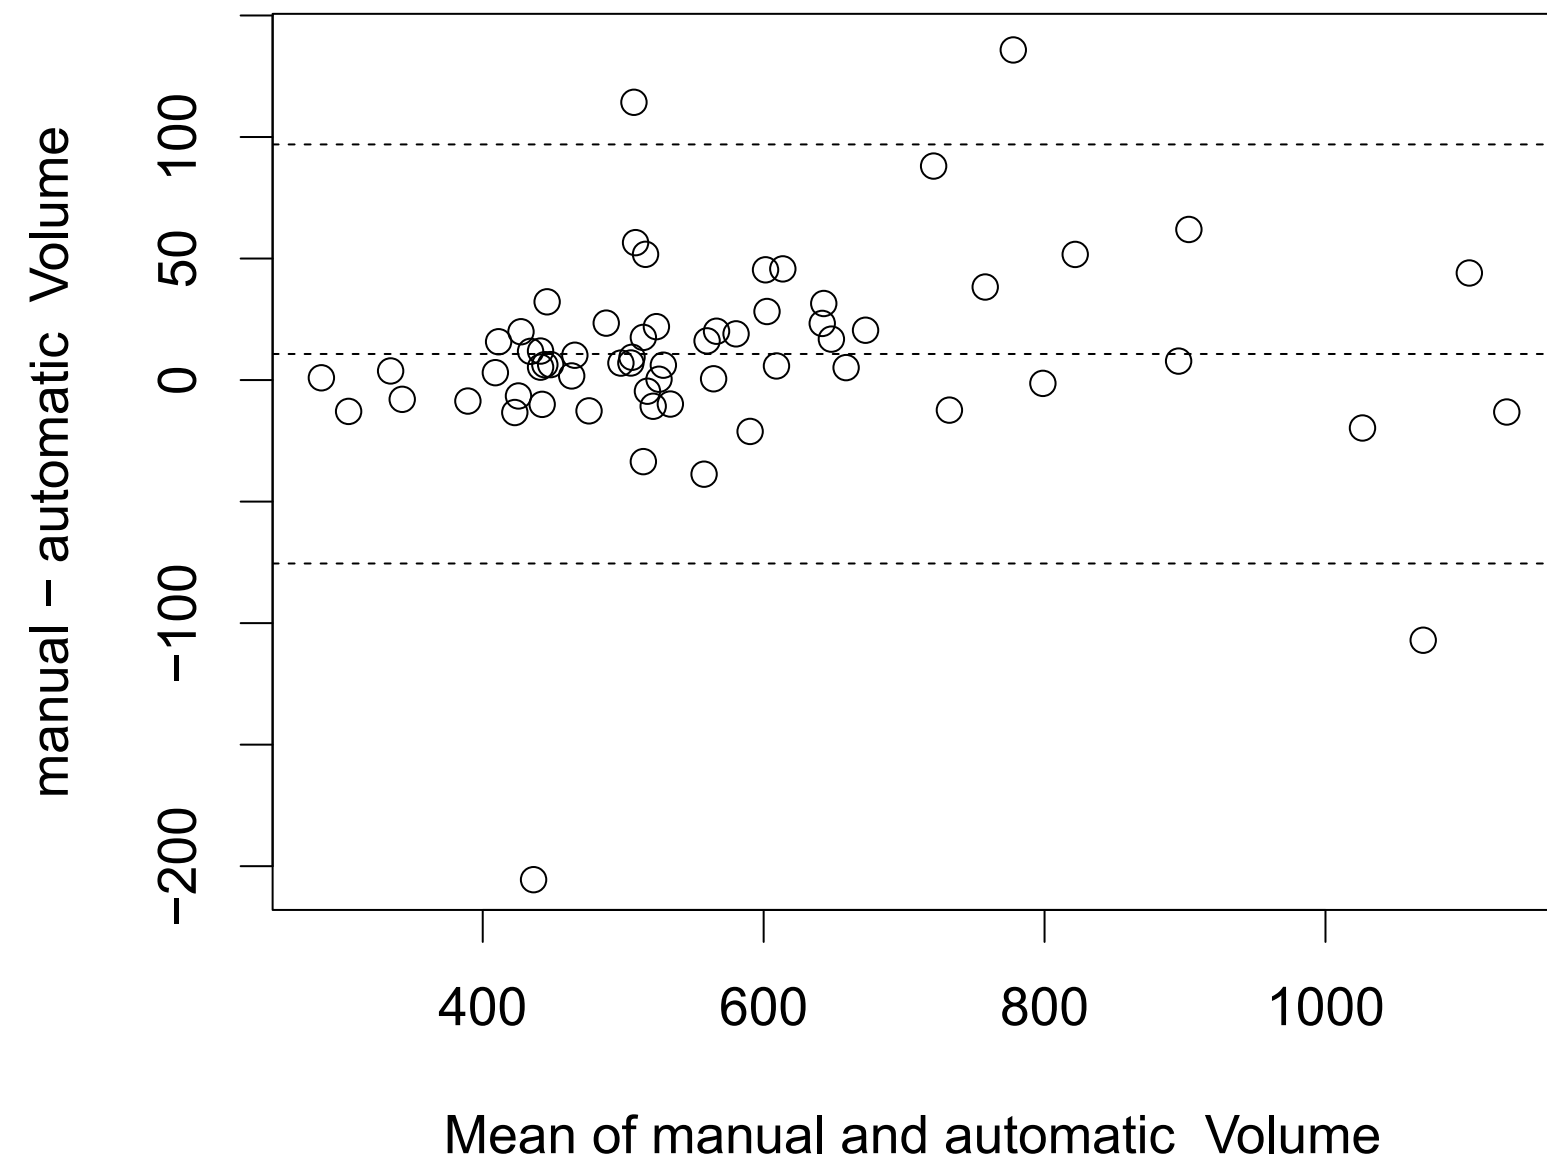**LLi B30f**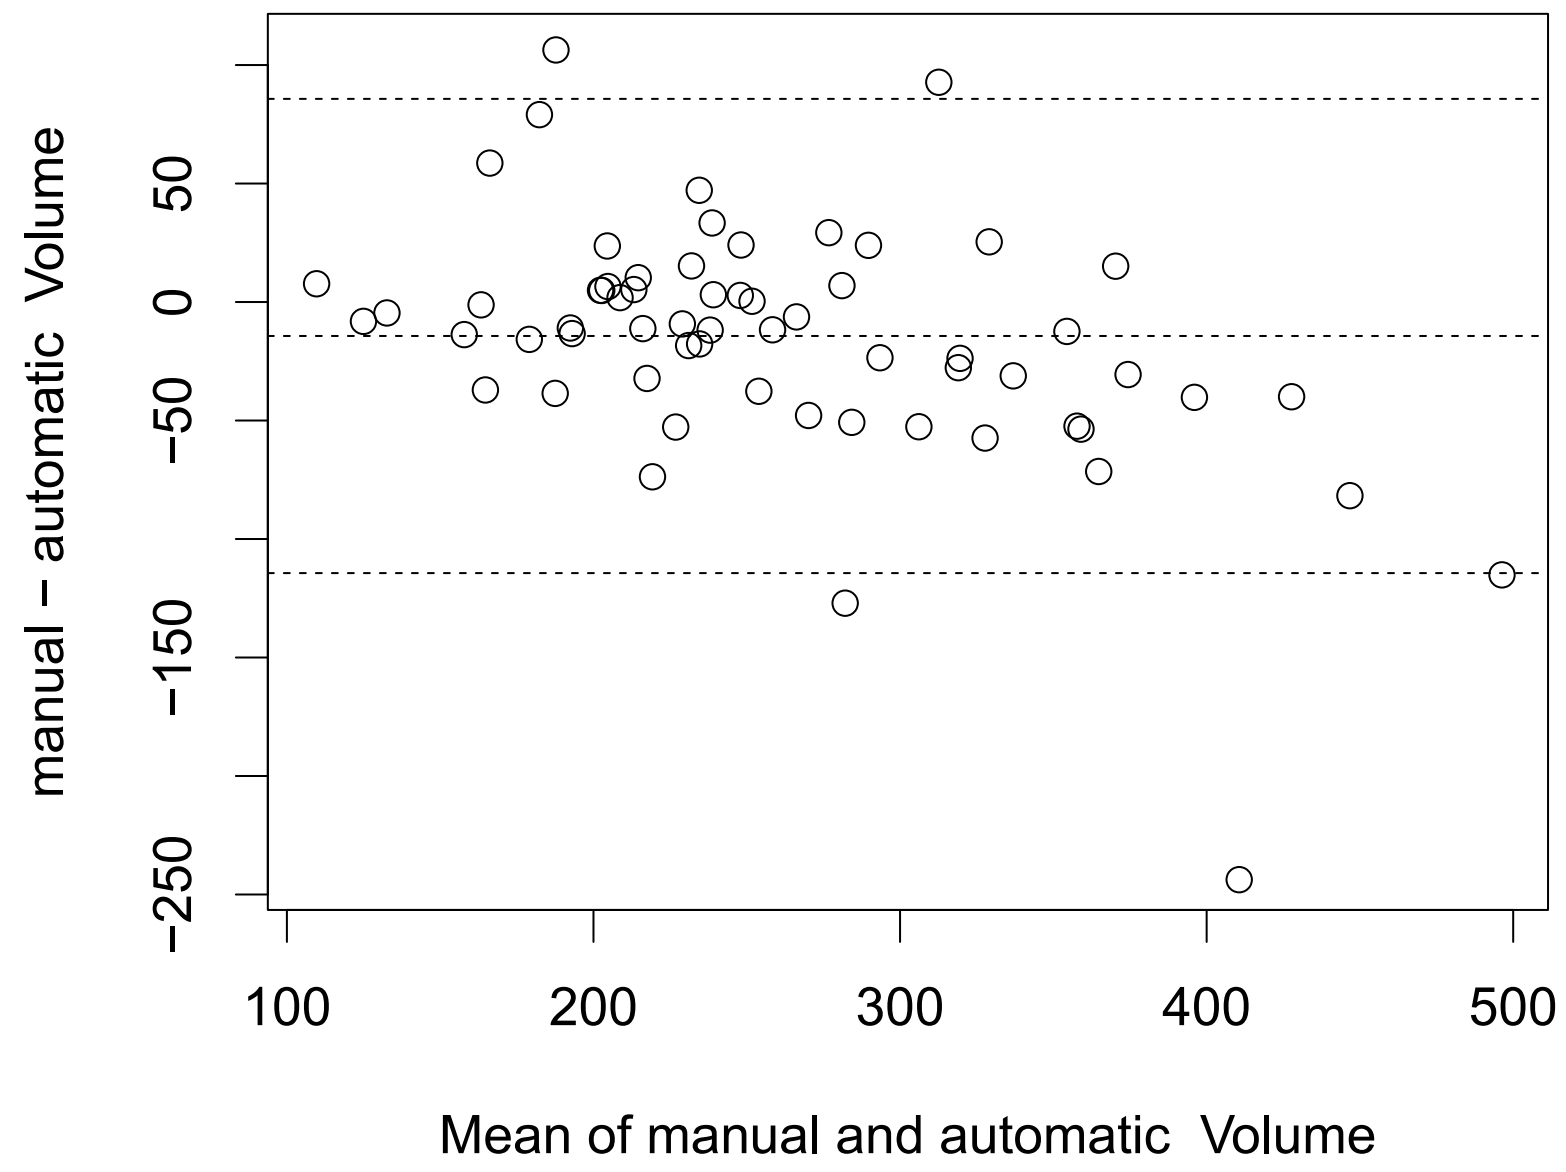**LLL B30f**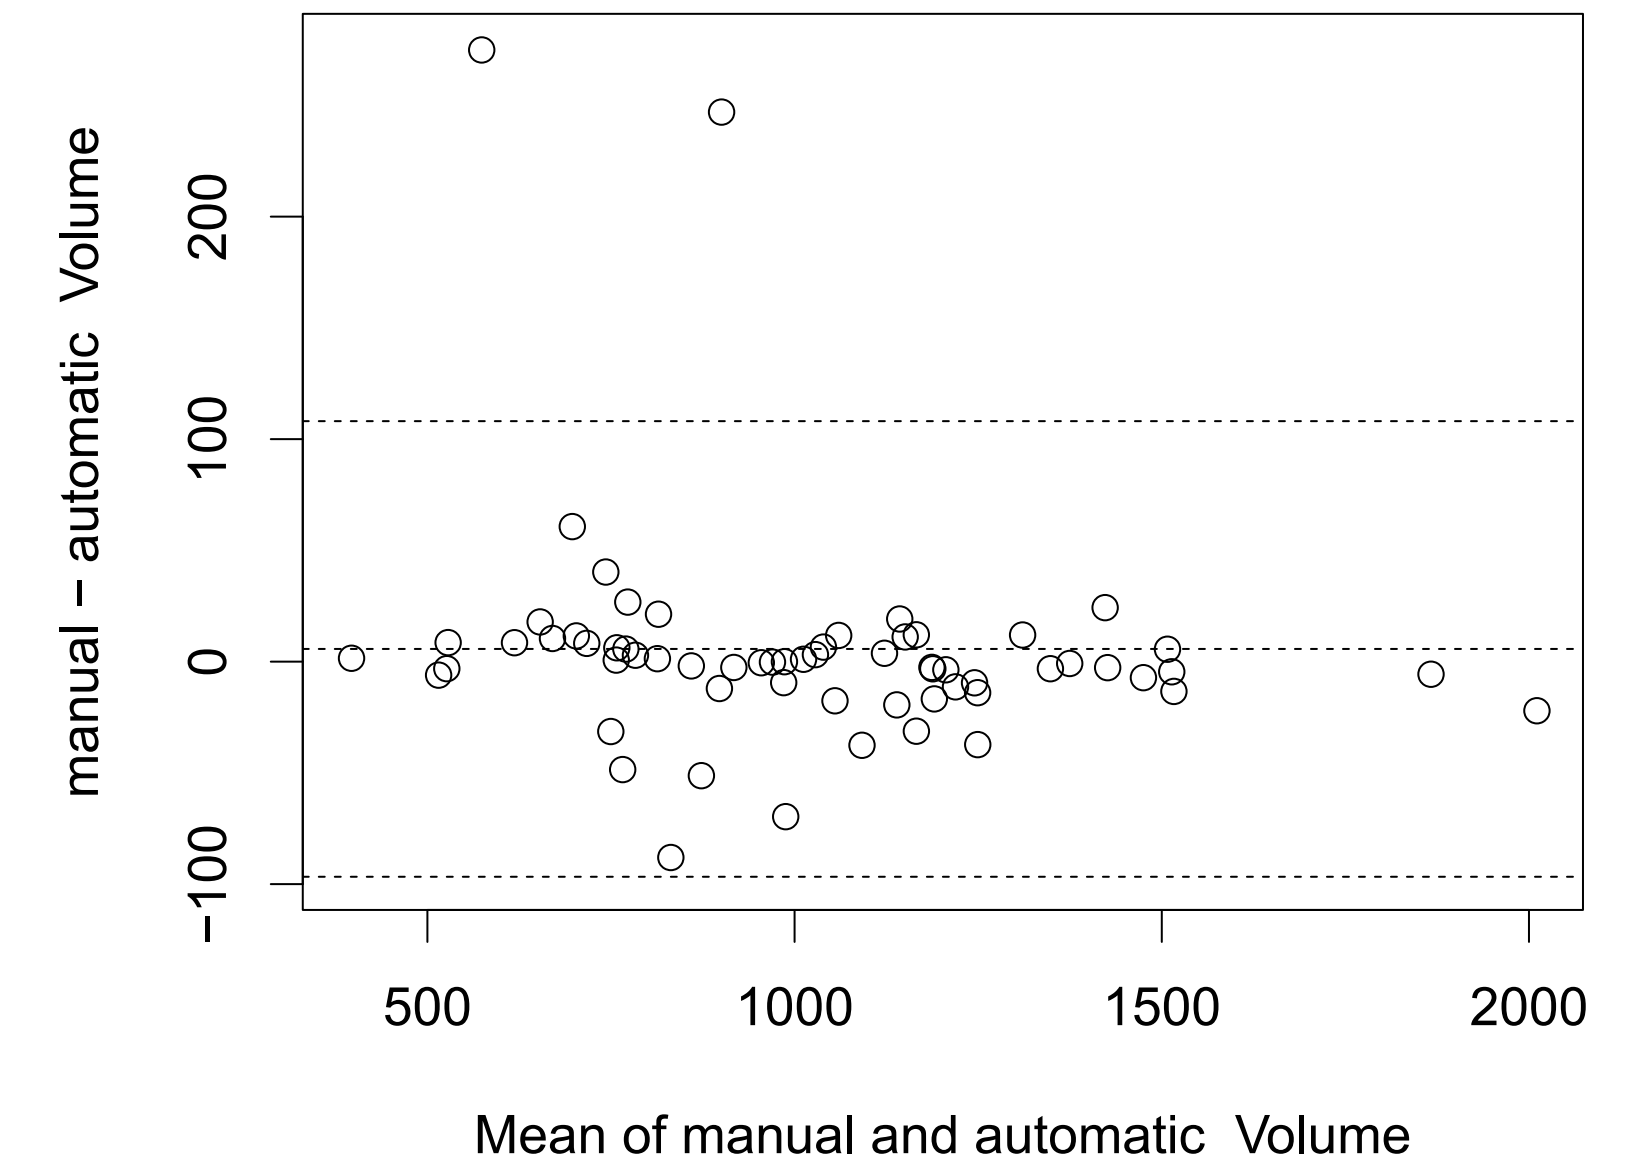**LUL+LLi B30f**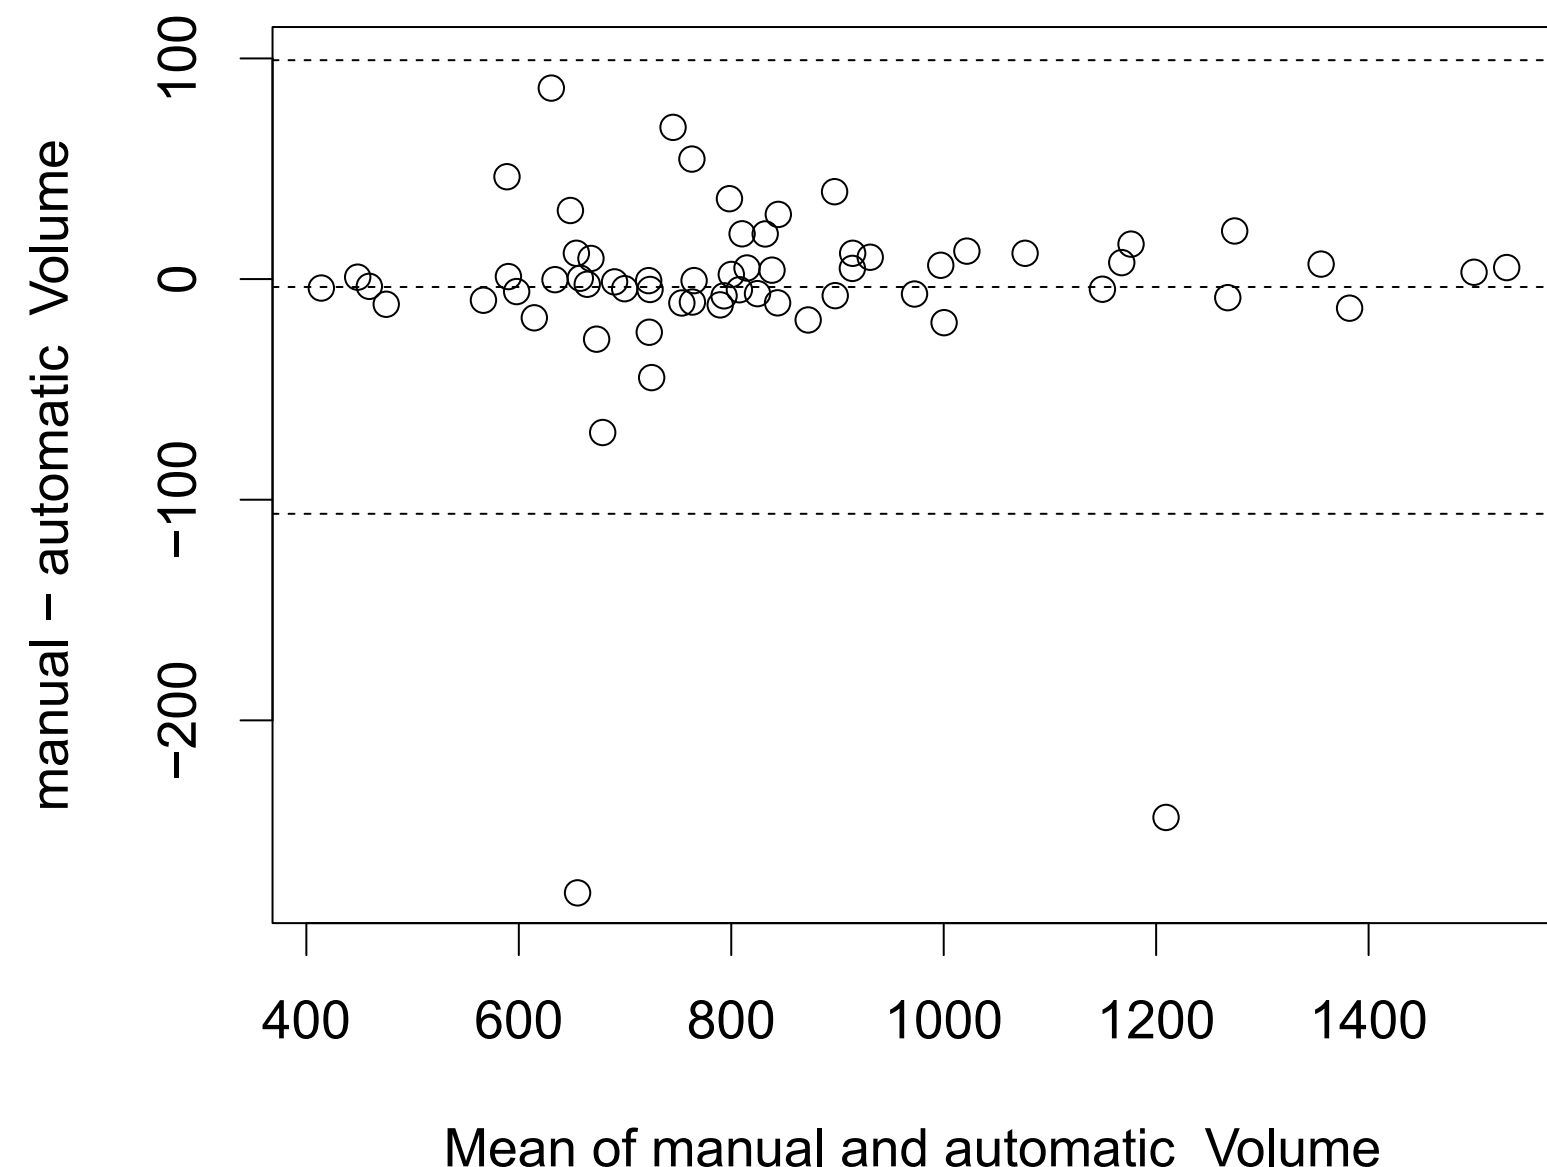

Supplement: pone.0194557.s002.pdf [file pone.0194557.s002.pdf]
