# Supplementary material for: Validation of automated lobe segmentation on paired inspiratory-expiratory chest CT in 8-14 year-old children with cystic fibrosis
Source: PubMed Central journal article supplement (PMC5890971; doi:10.1371/journal.pone.0194557), 2018-04-09

**RUL B60f**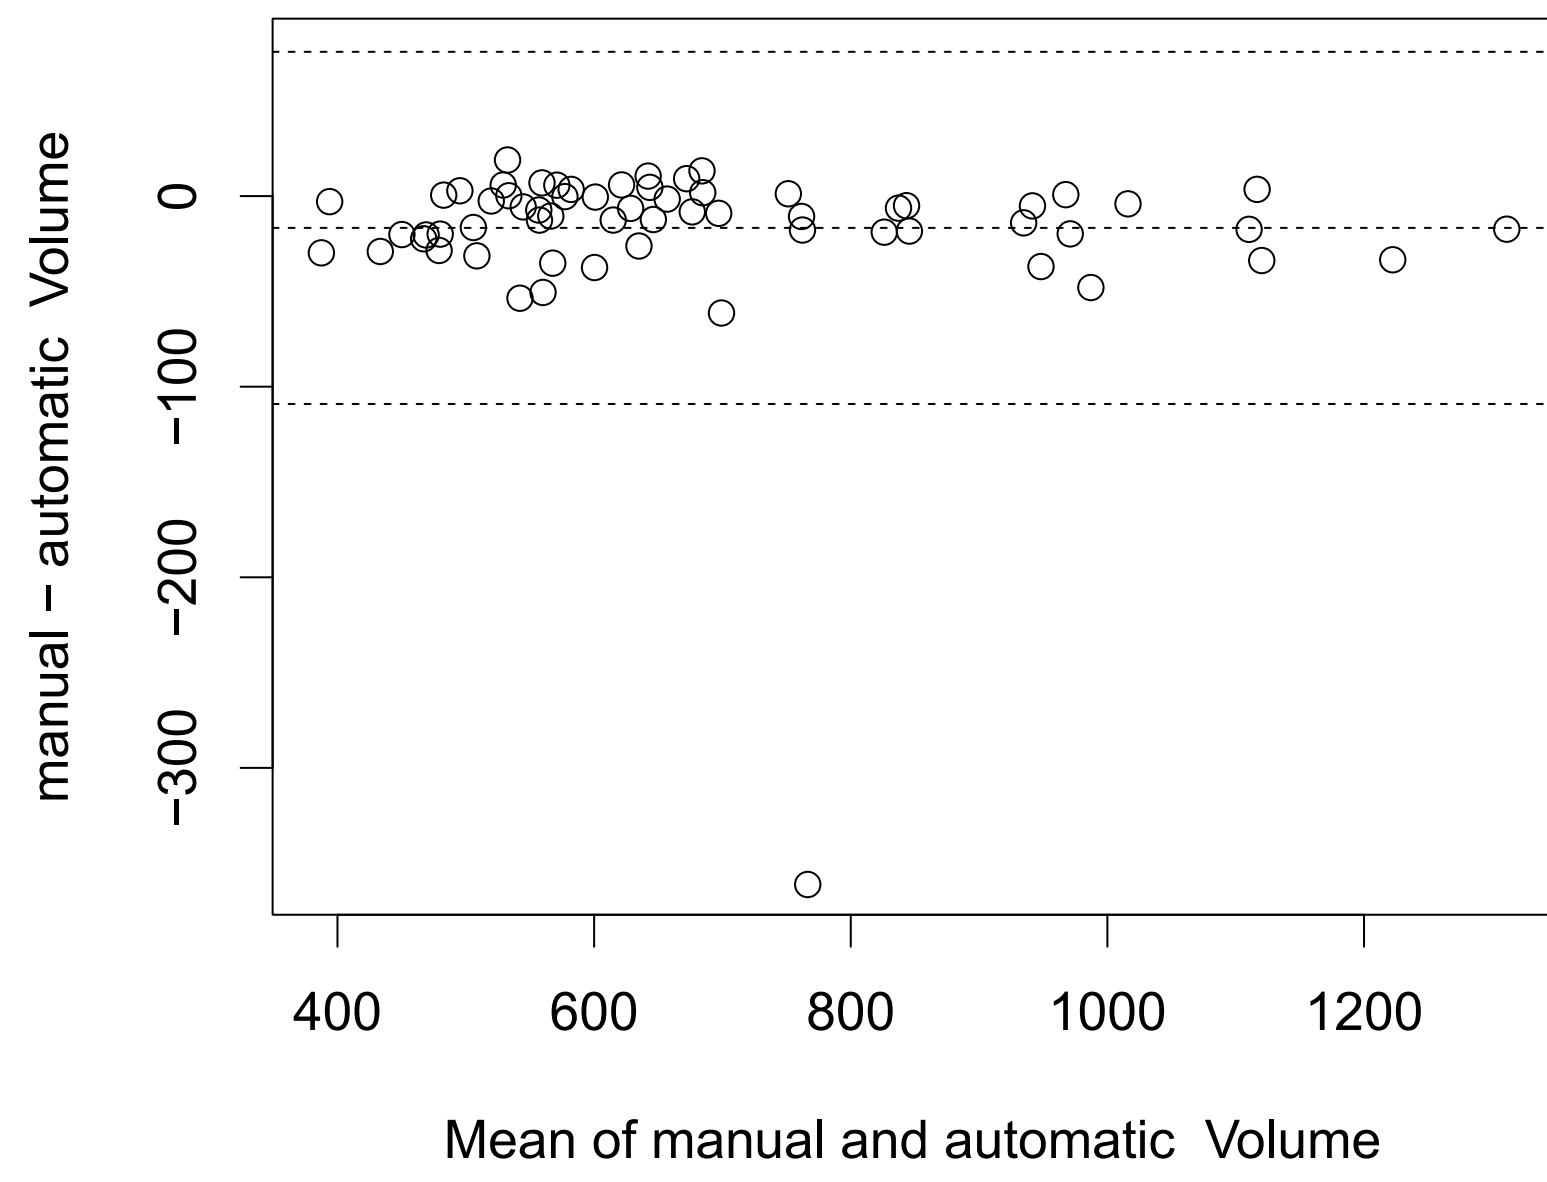**RML B60f**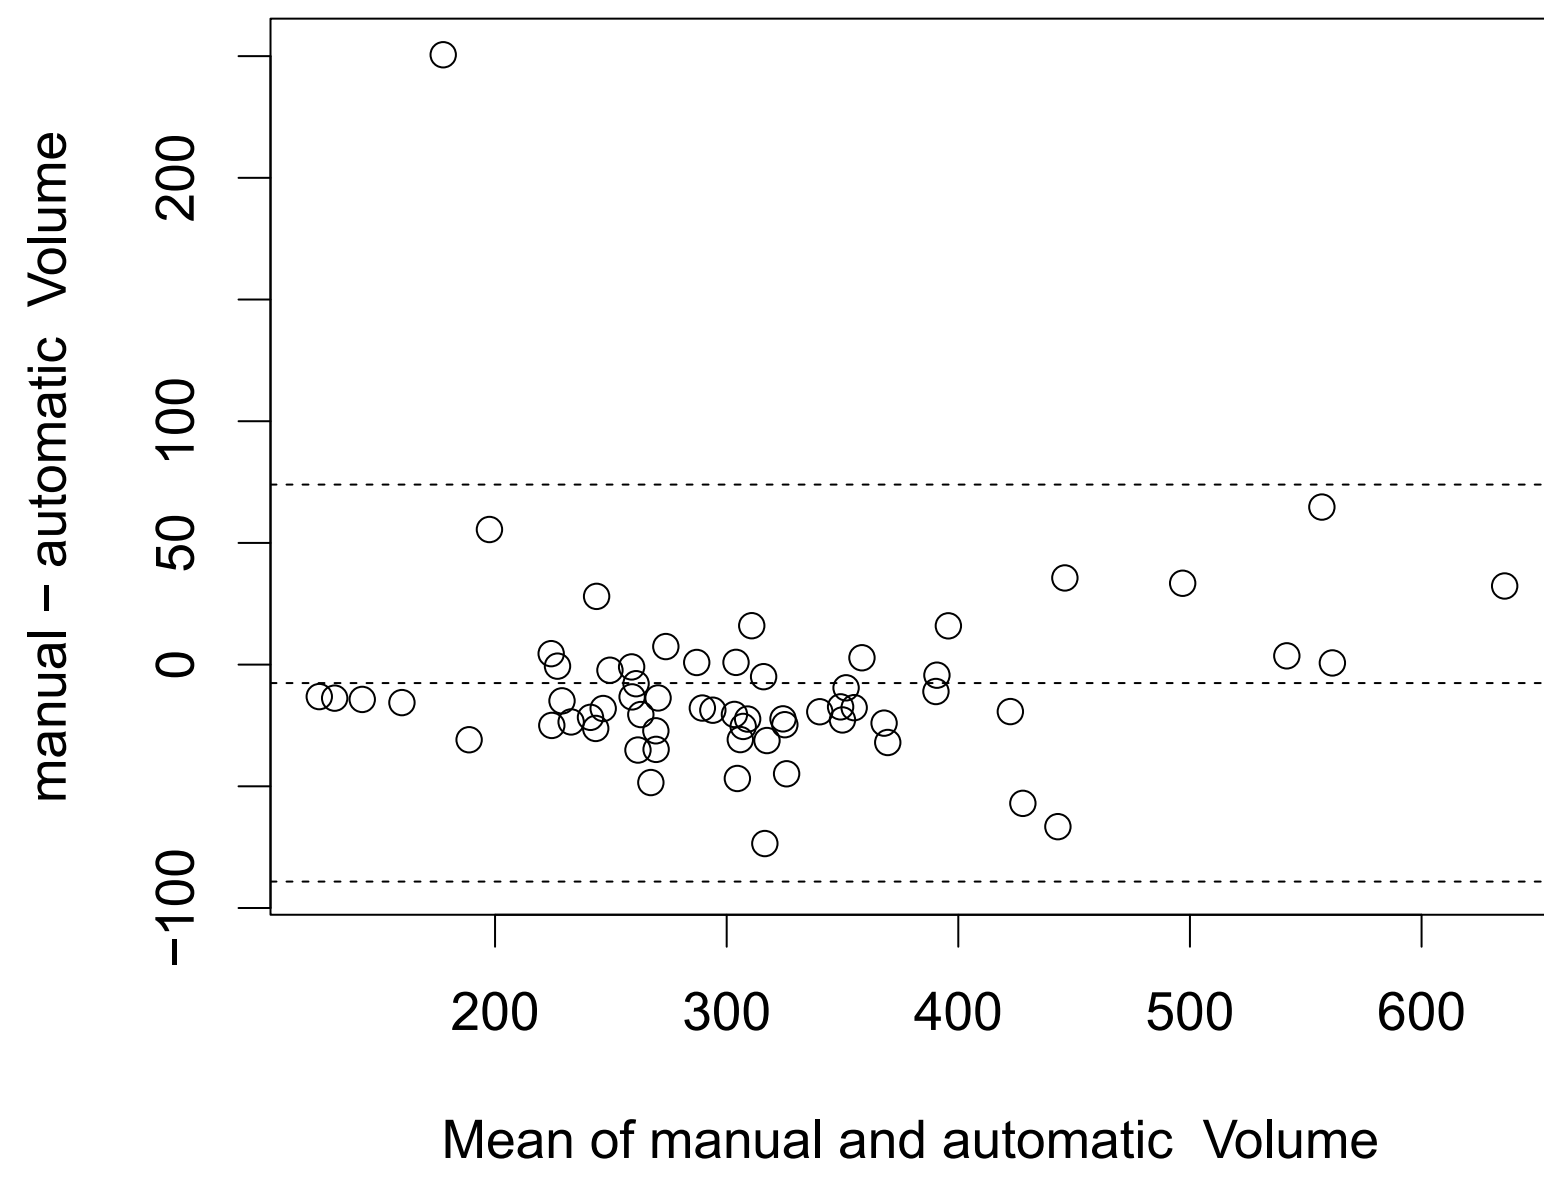**RLL B60f**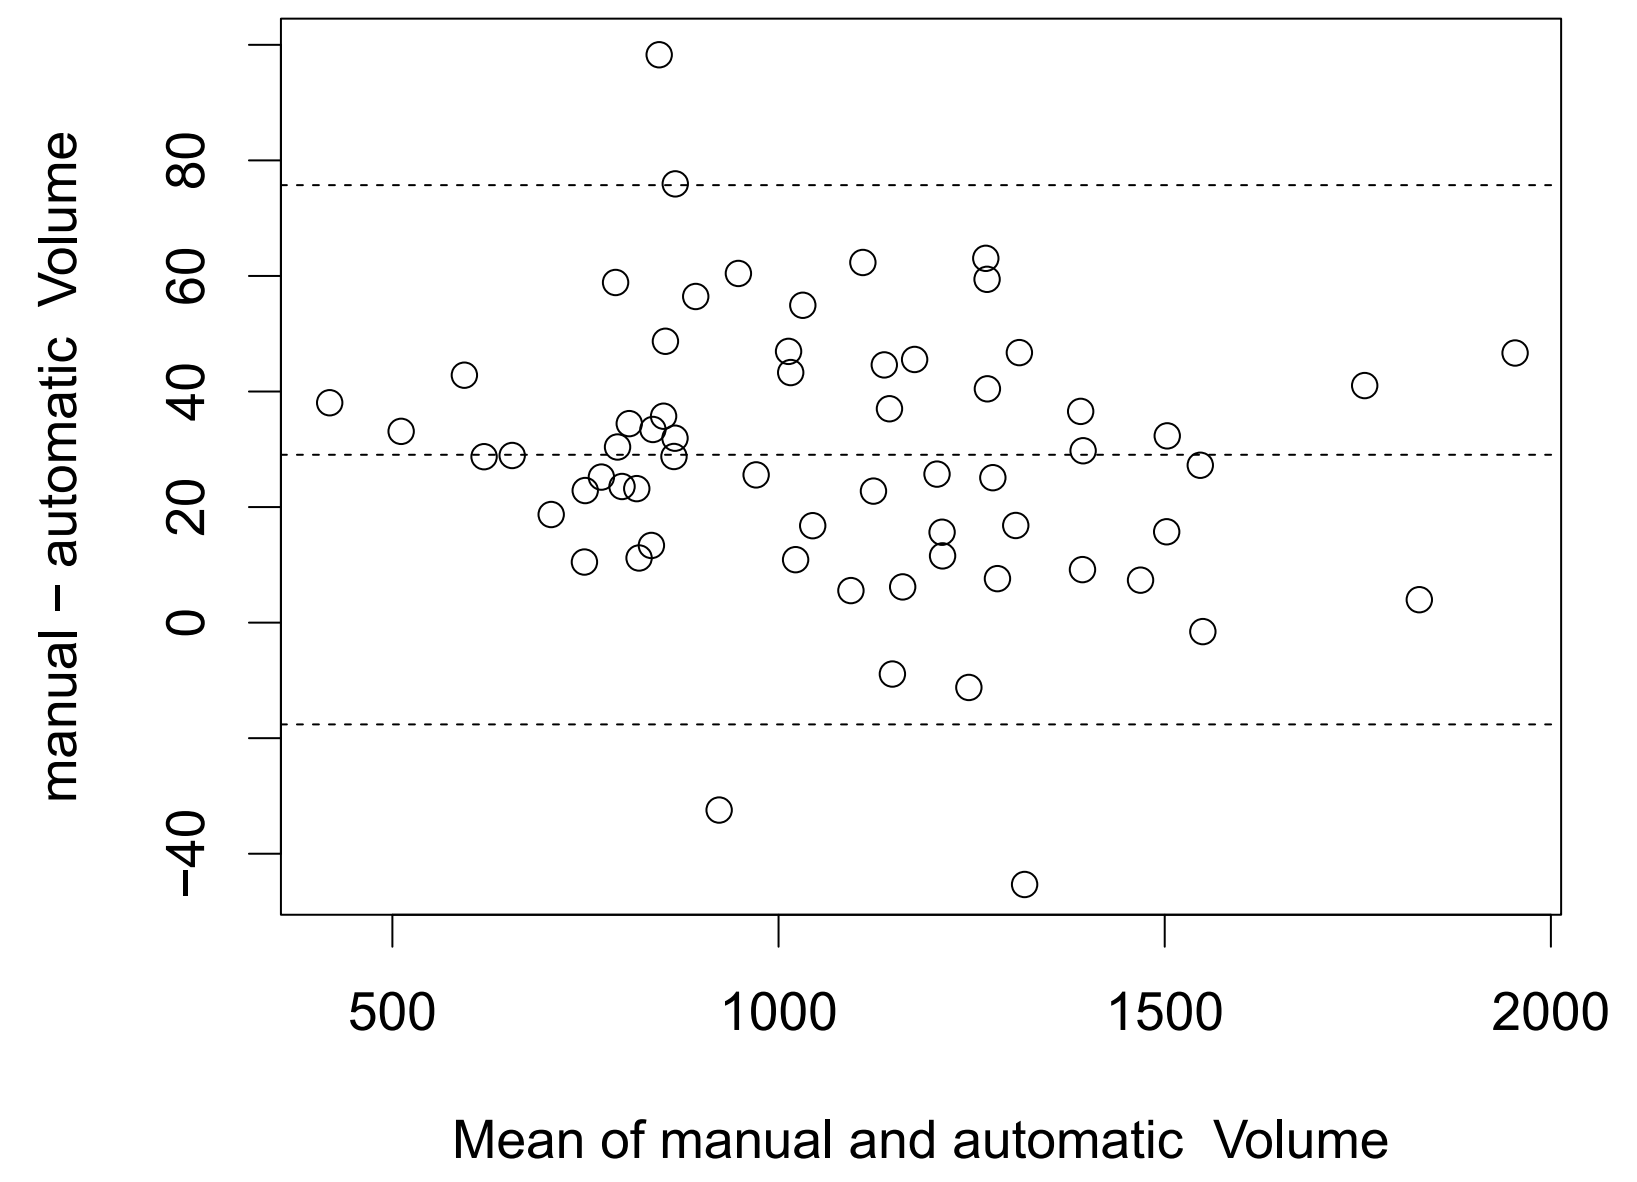**LUL B60f**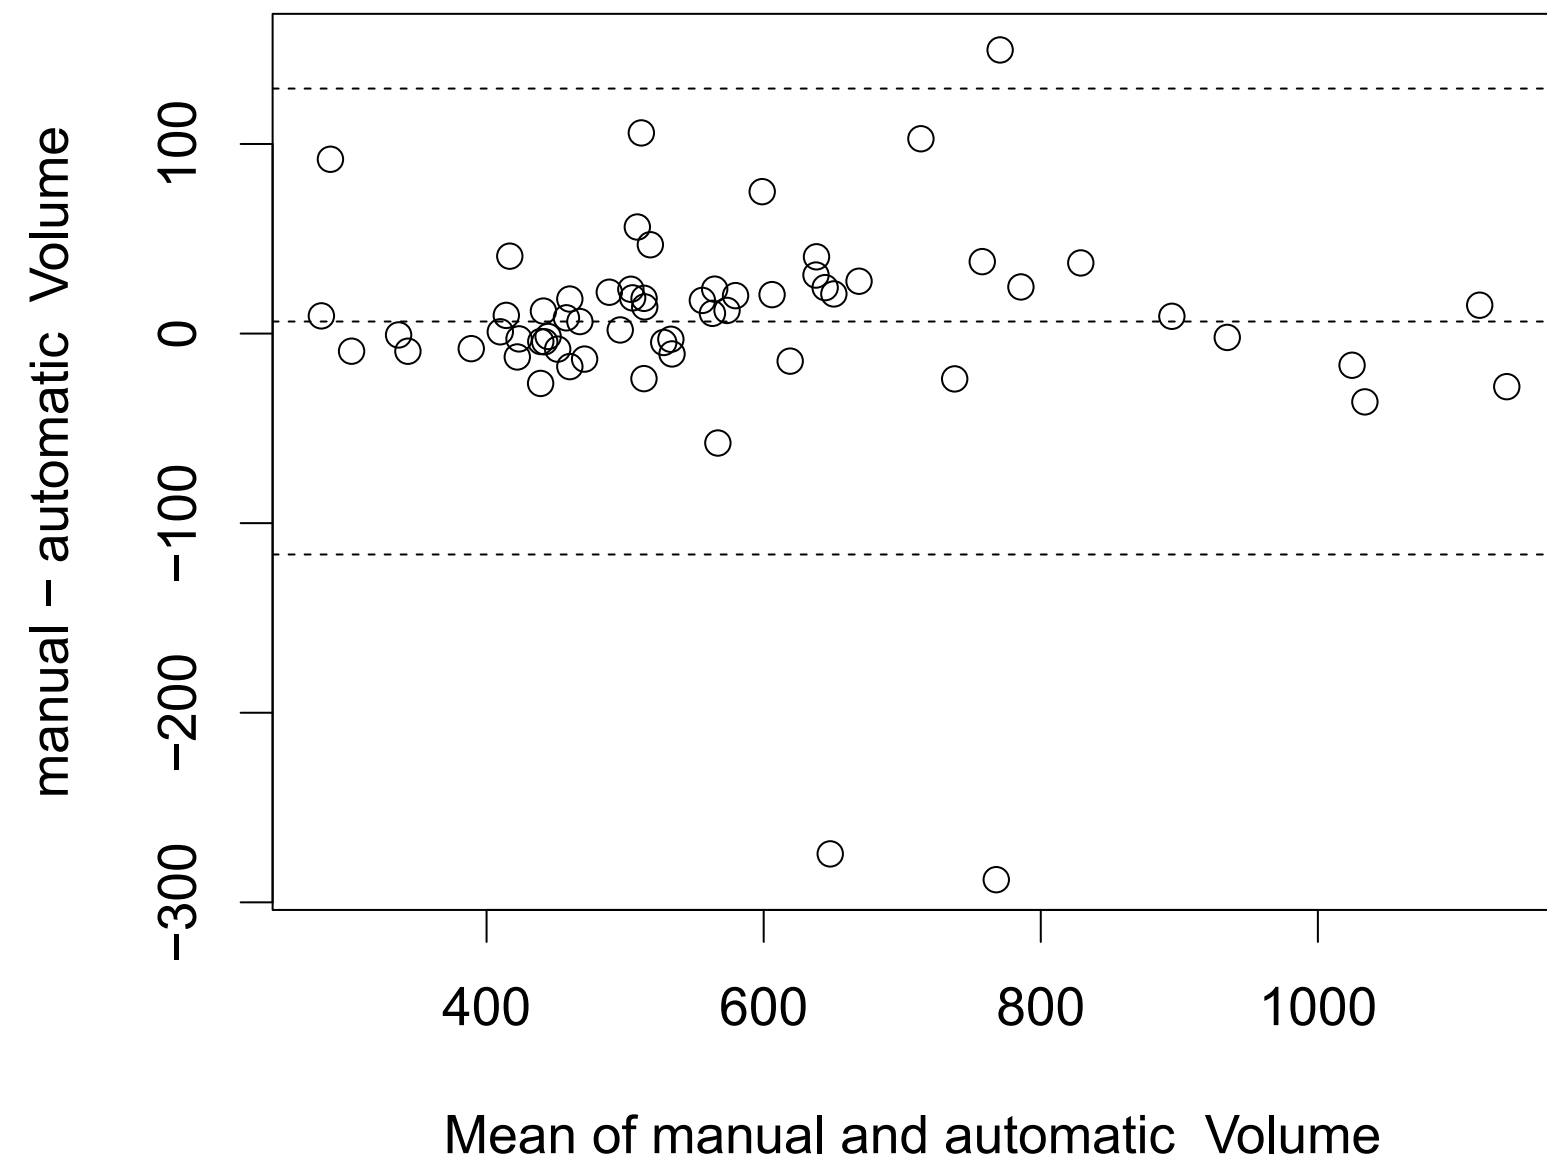**LLi B60f**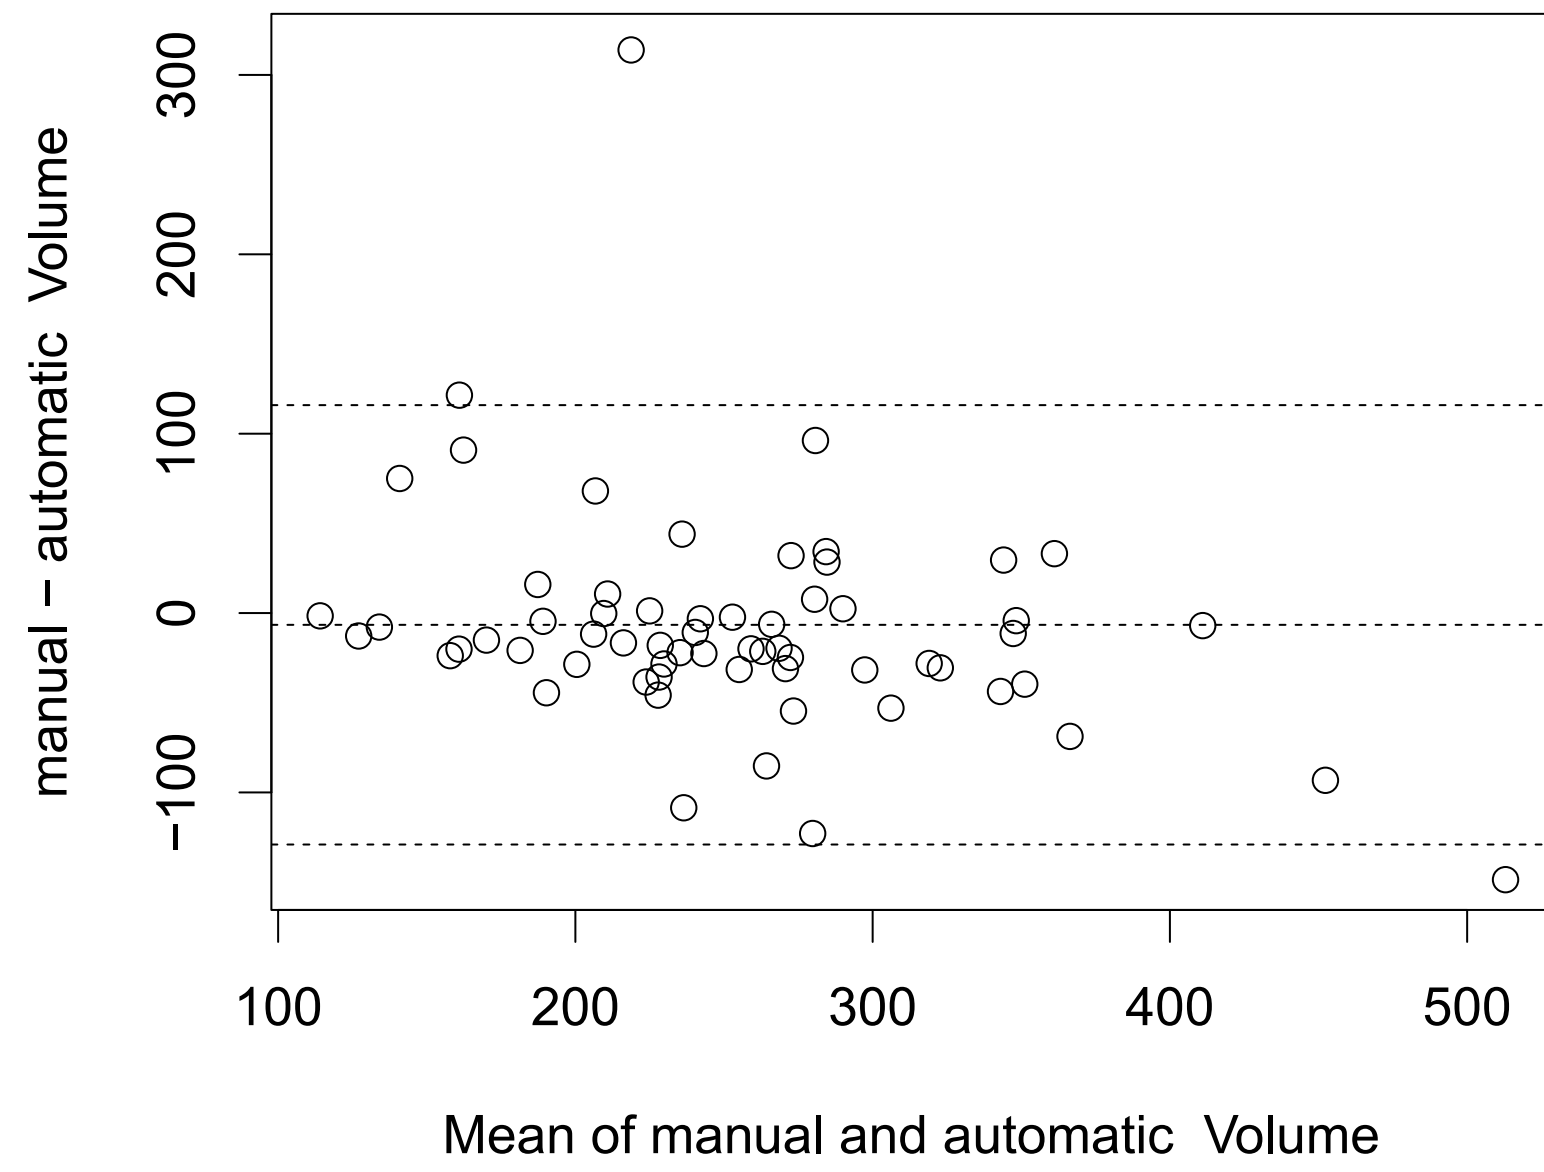**LLL B60f**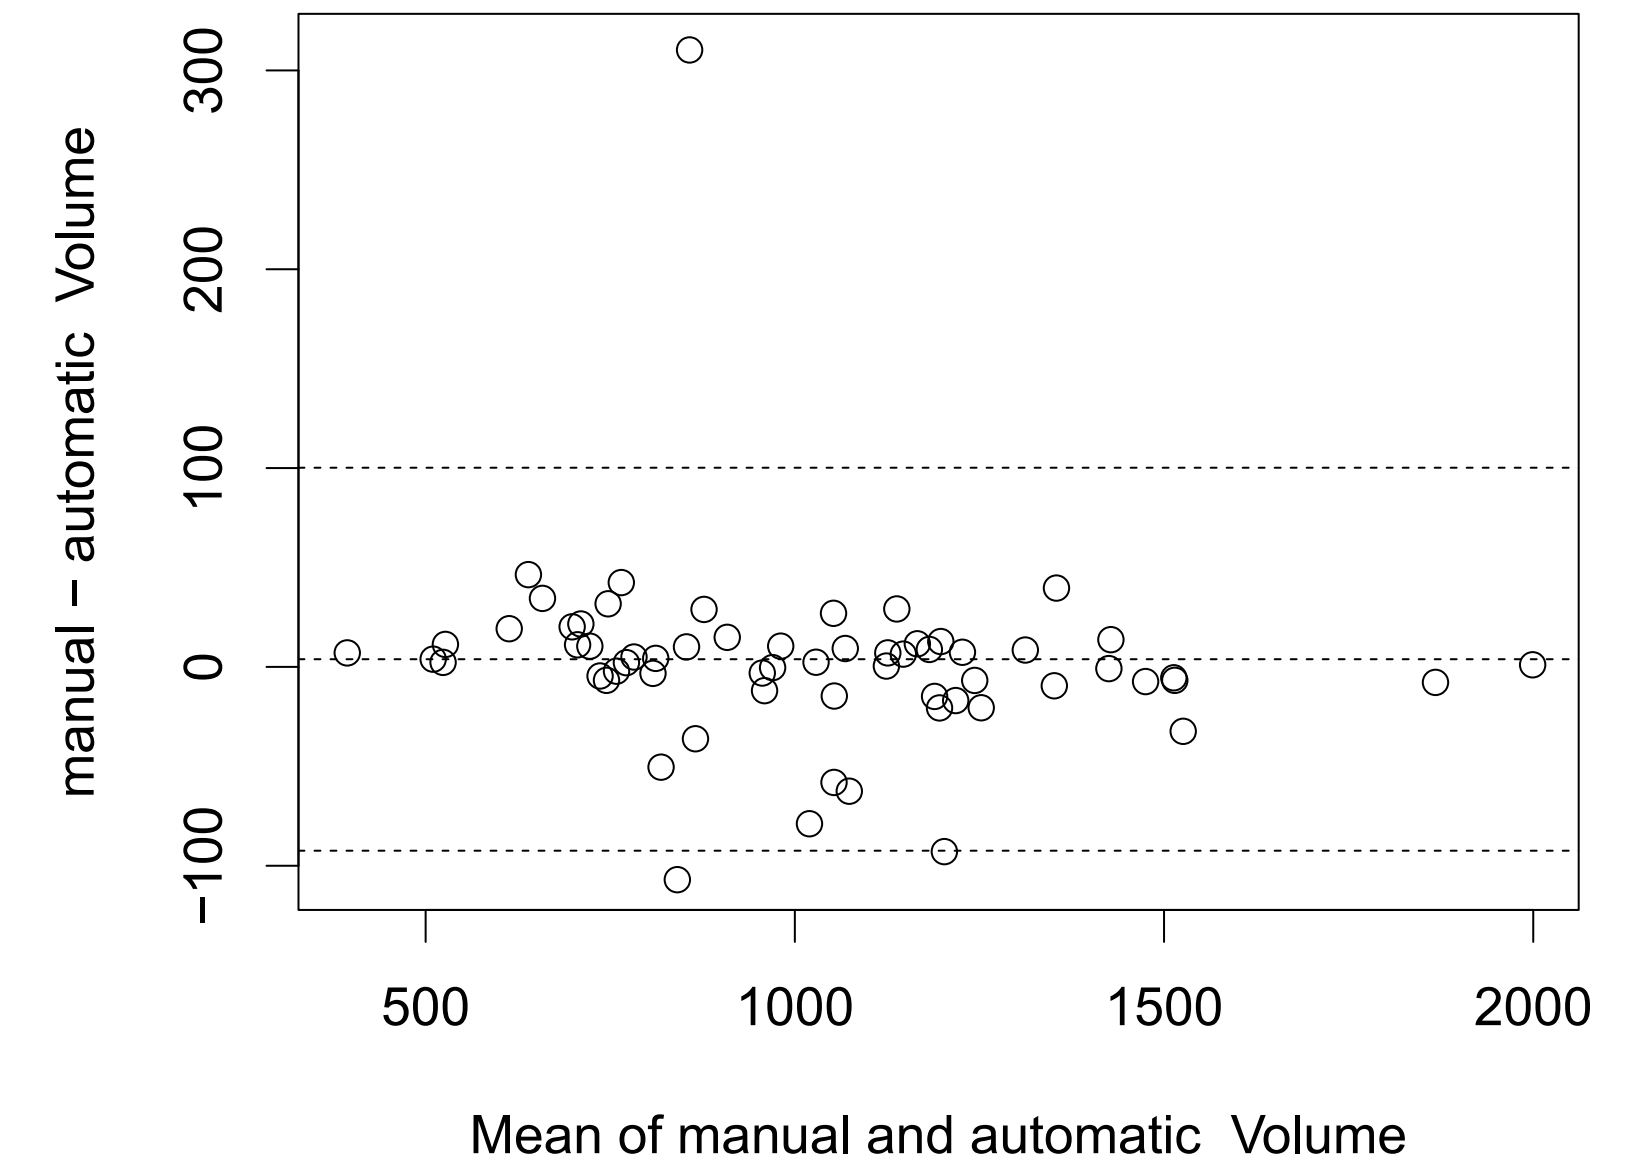**LUL+LLi B60f**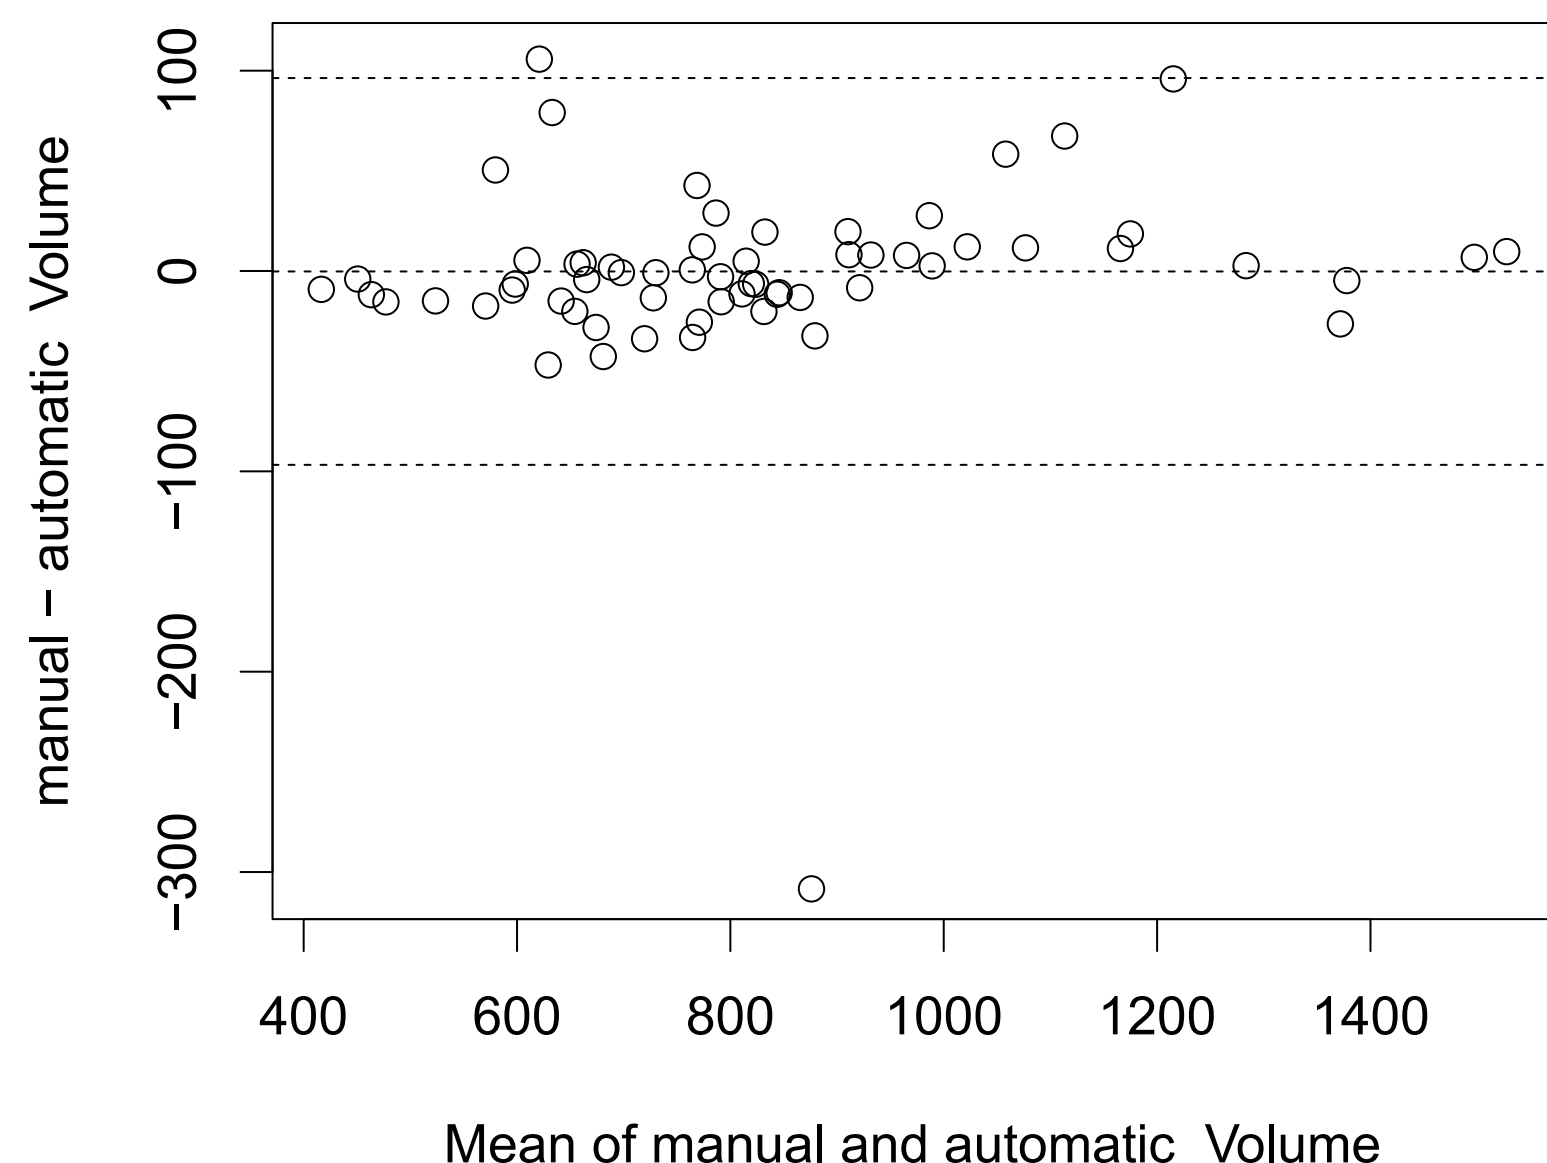

Supplement: pone.0194557.s004.pdf [file pone.0194557.s004.pdf]
