# Supplementary material for: Validation of automated lobe segmentation on paired inspiratory-expiratory chest CT in 8-14 year-old children with cystic fibrosis
Source: PubMed Central journal article supplement (PMC5890971; doi:10.1371/journal.pone.0194557), 2018-04-09
Supplement: pone.0194557.s010.pdf [file pone.0194557.s010.pdf]

**RUL B30f**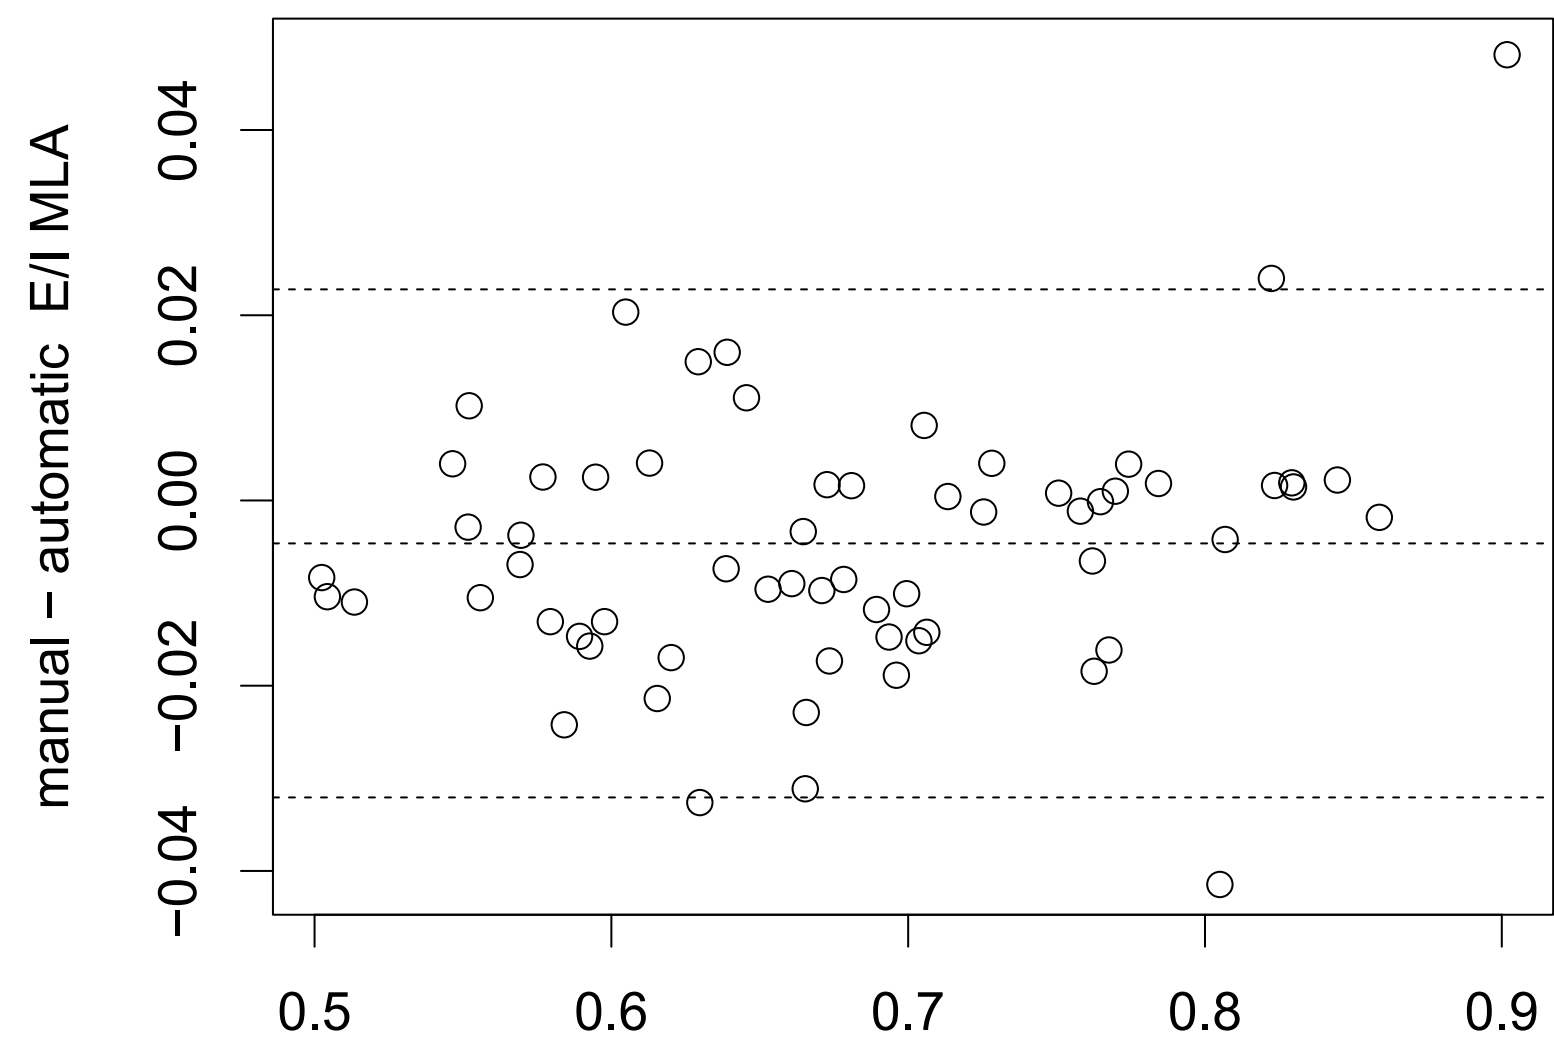

Mean of manual and automatic E/I MLA

**RML B30f**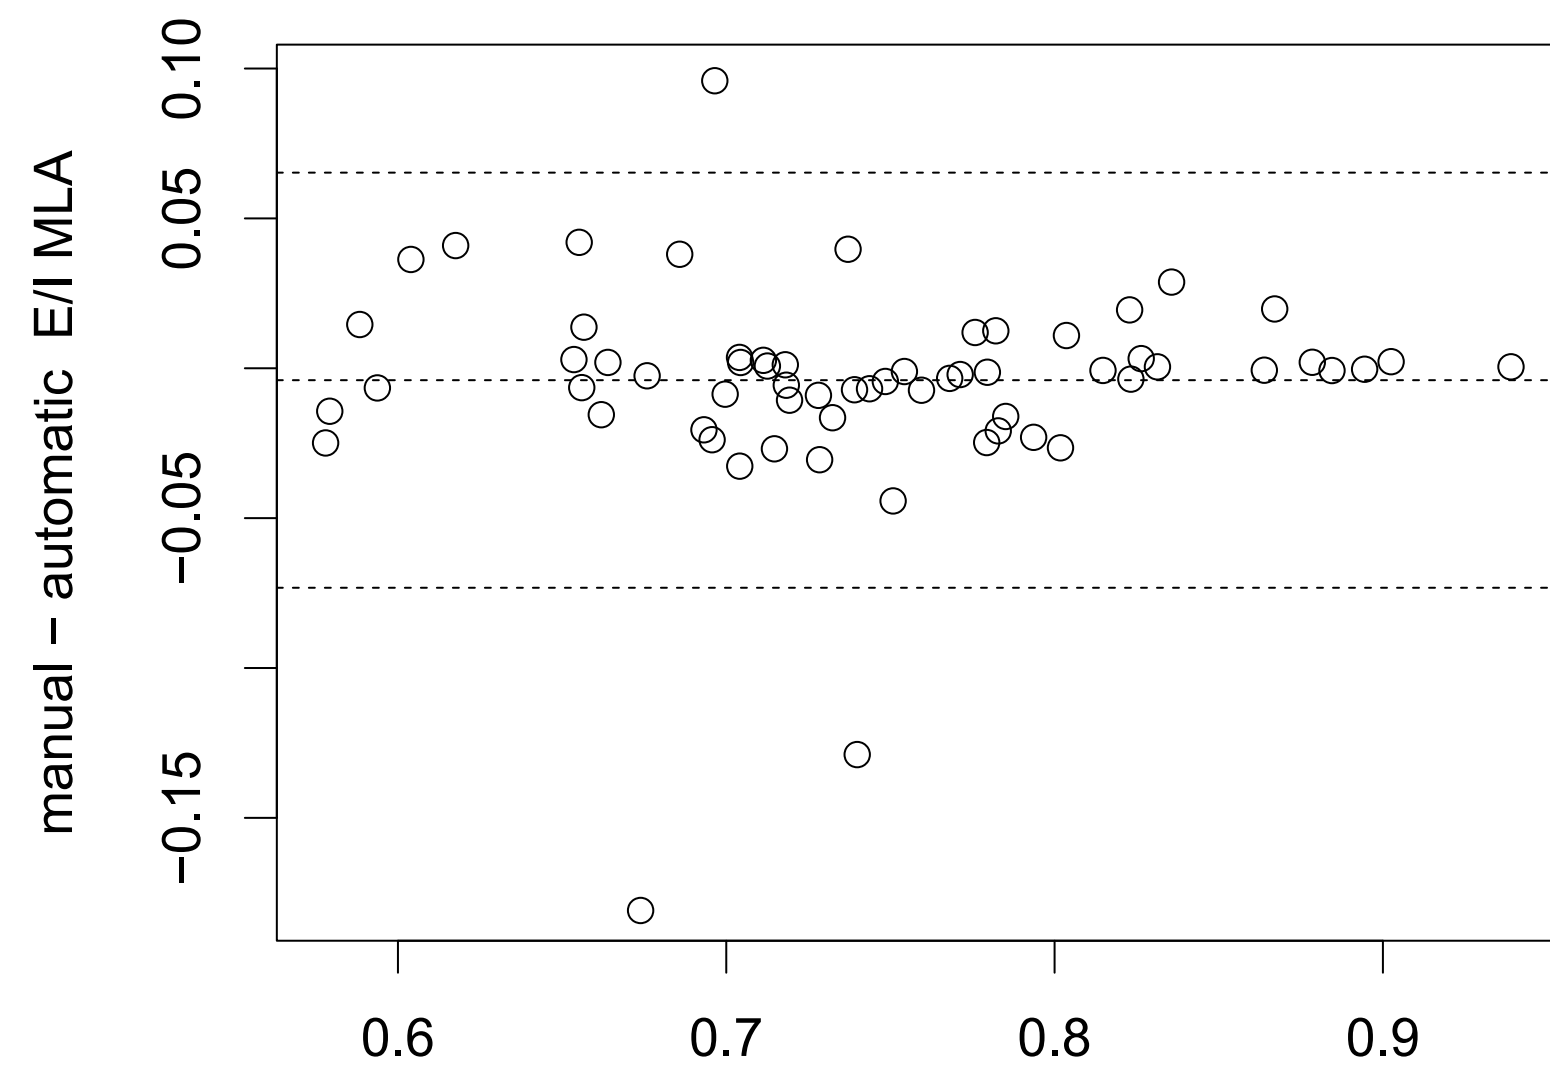

Mean of manual and automatic E/I MLA

**RLL B30f**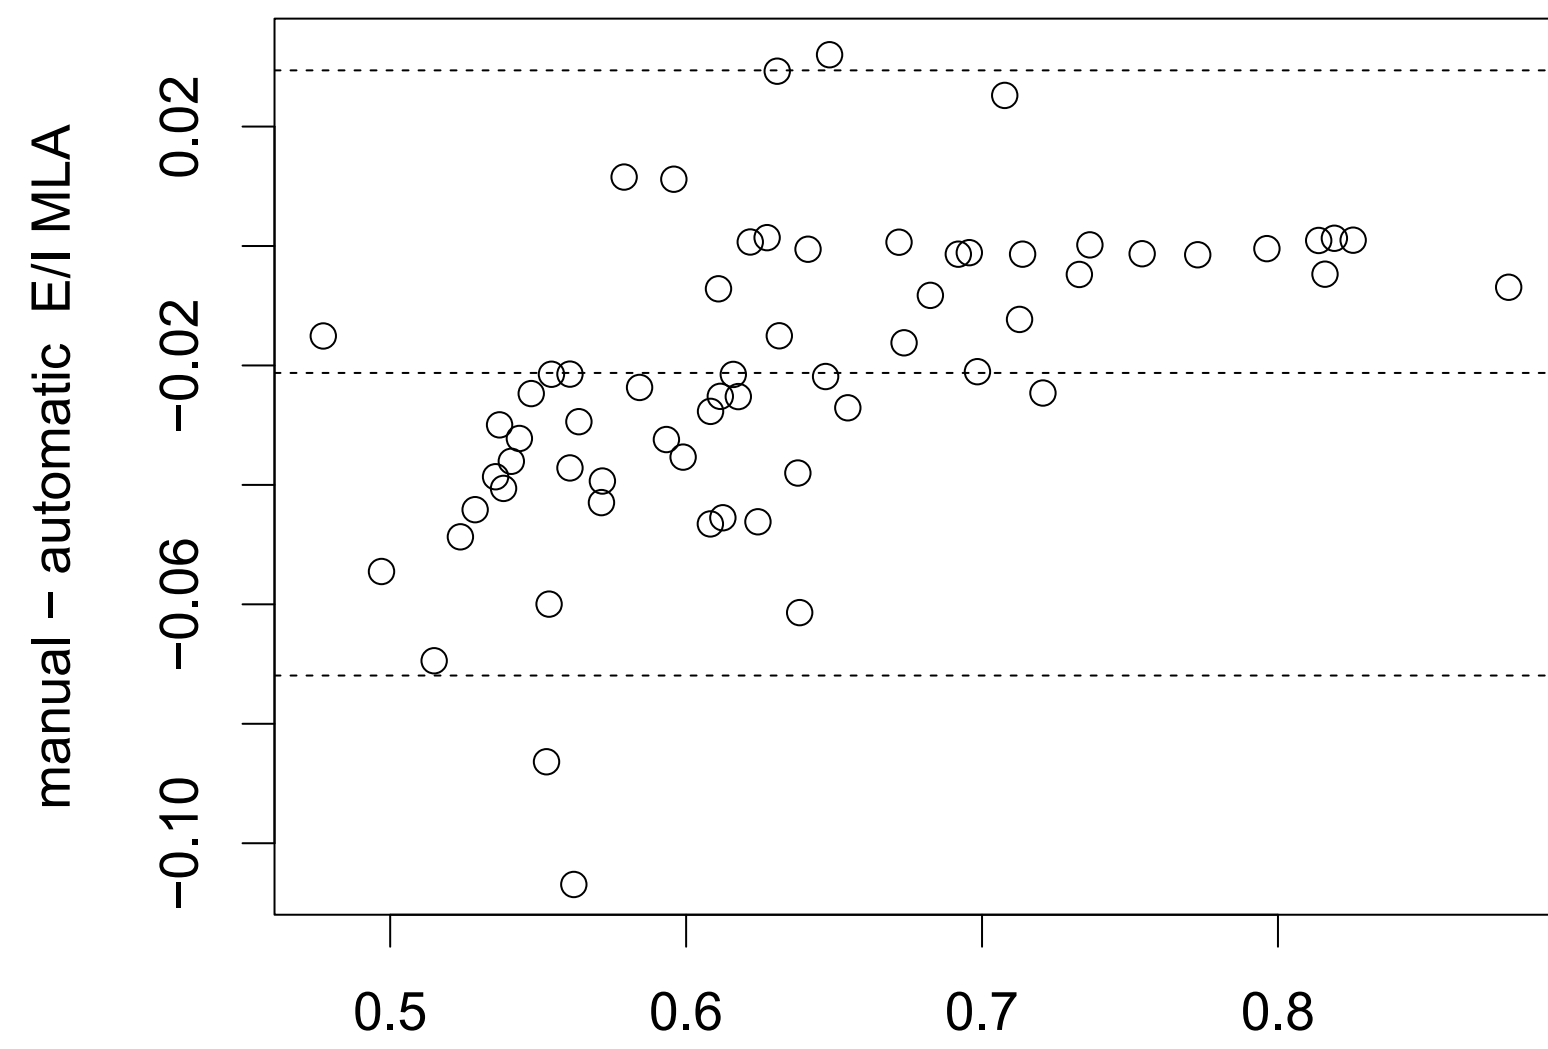

Mean of manual and automatic E/I MLA

**LUL B30f**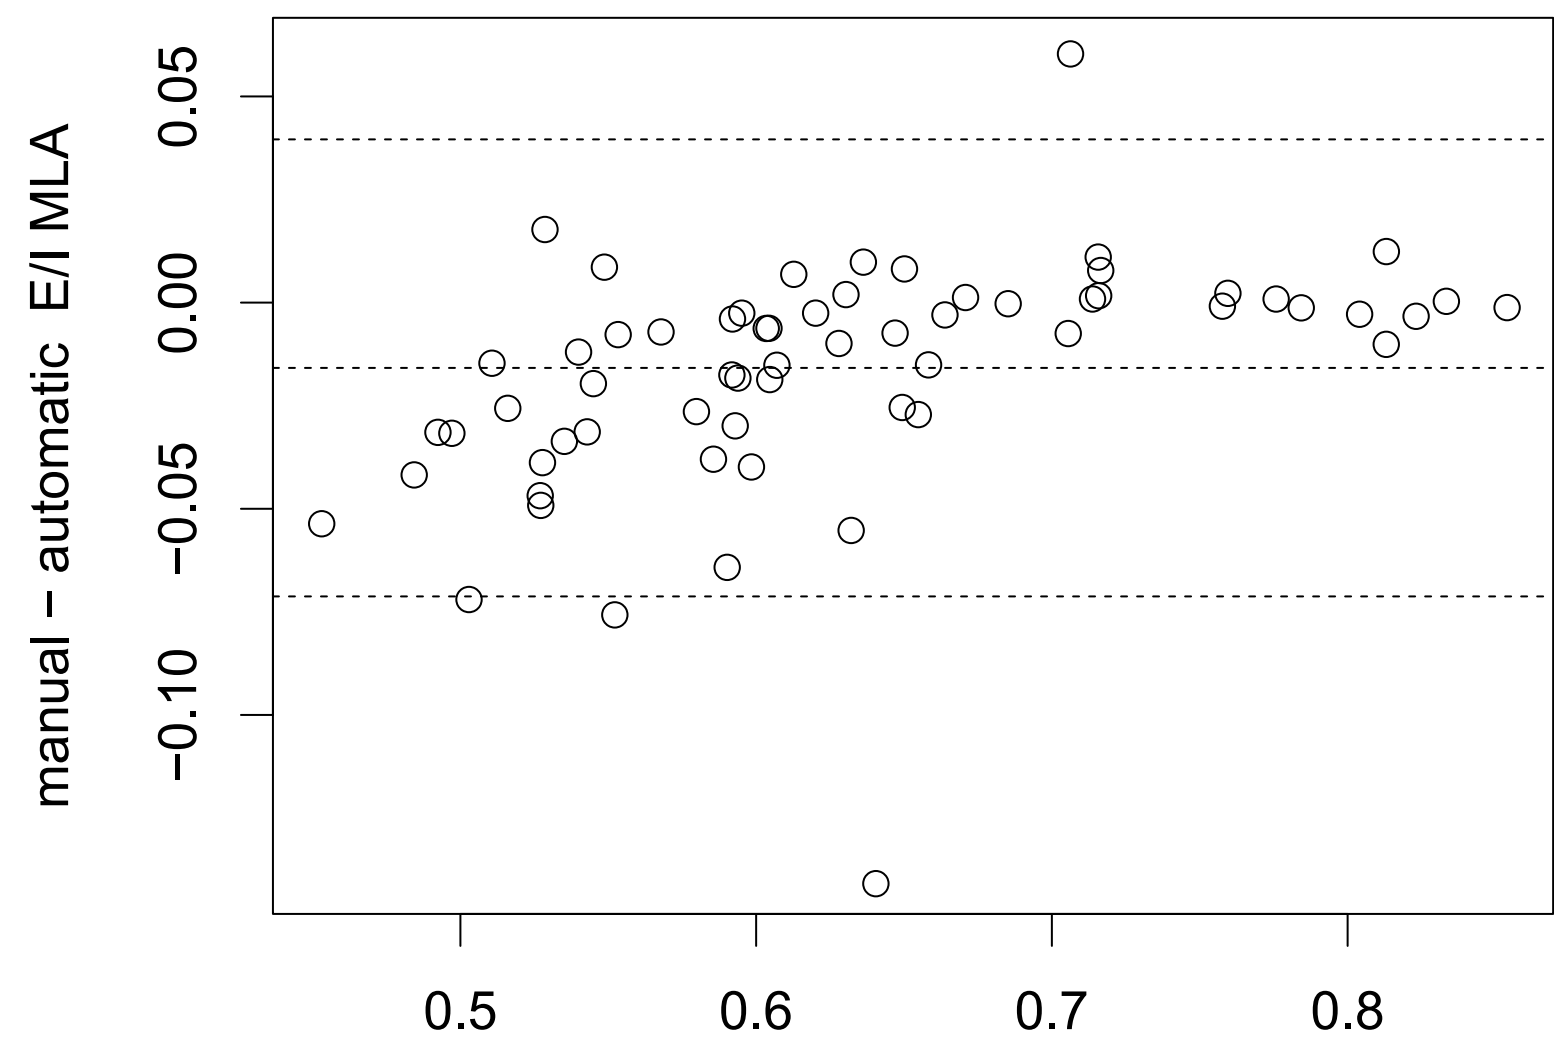

Mean of manual and automatic E/I MLA

**LLi B30f**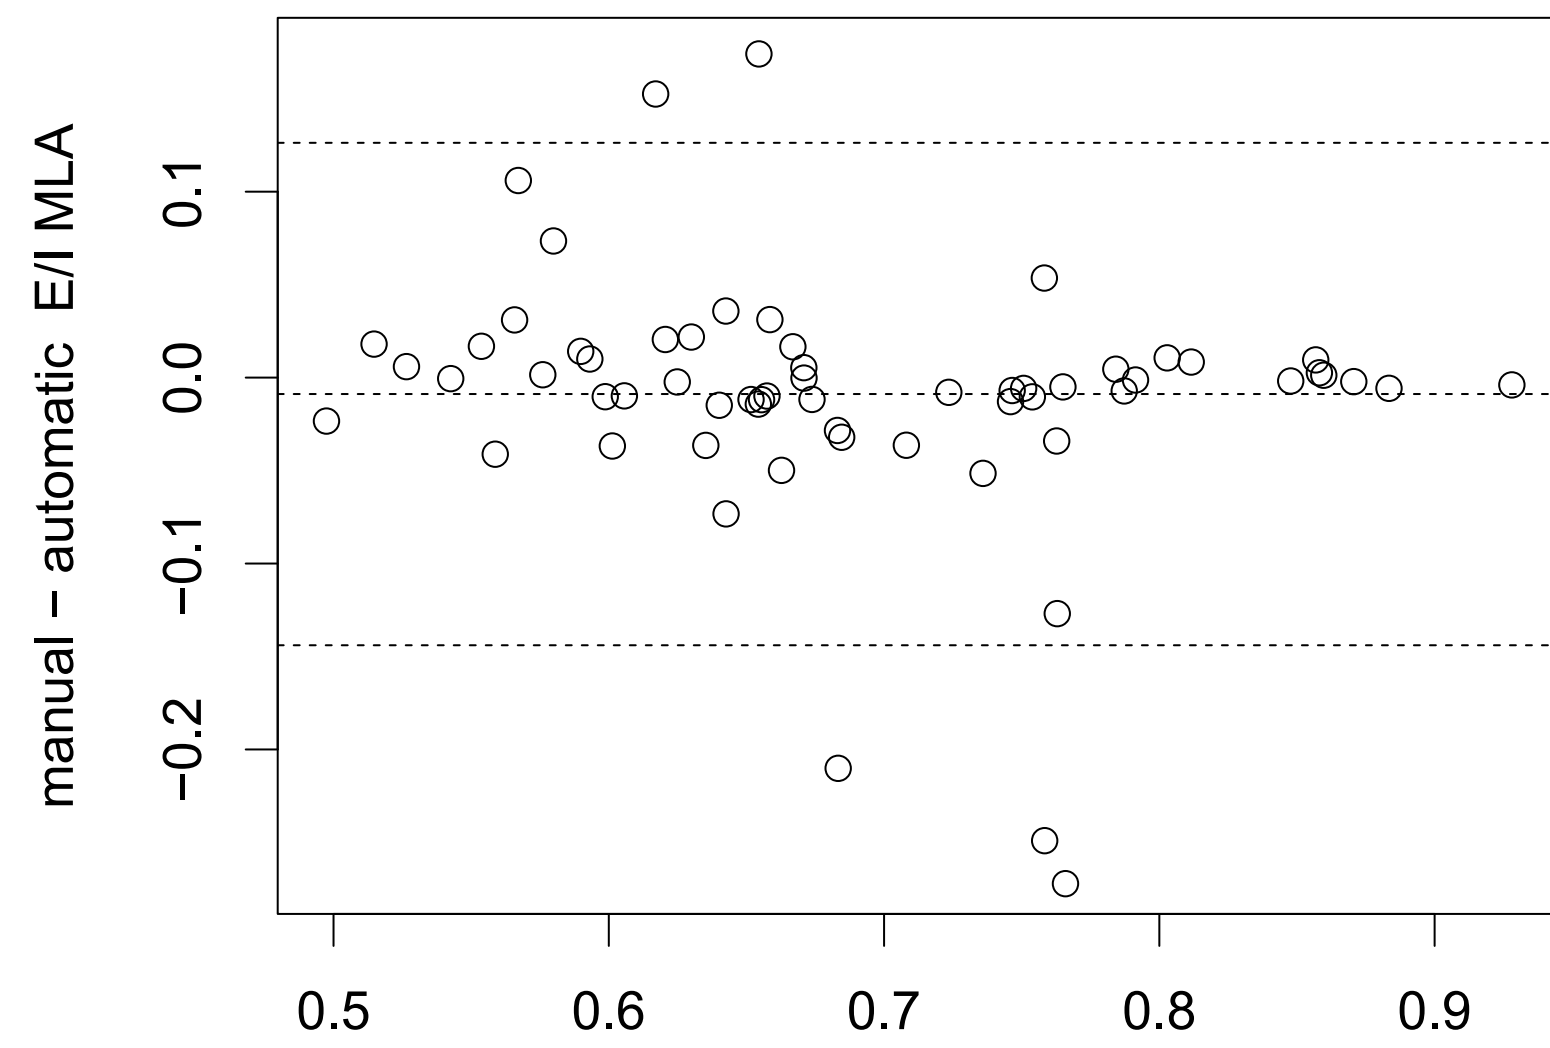

Mean of manual and automatic E/I MLA

**LLL B30f**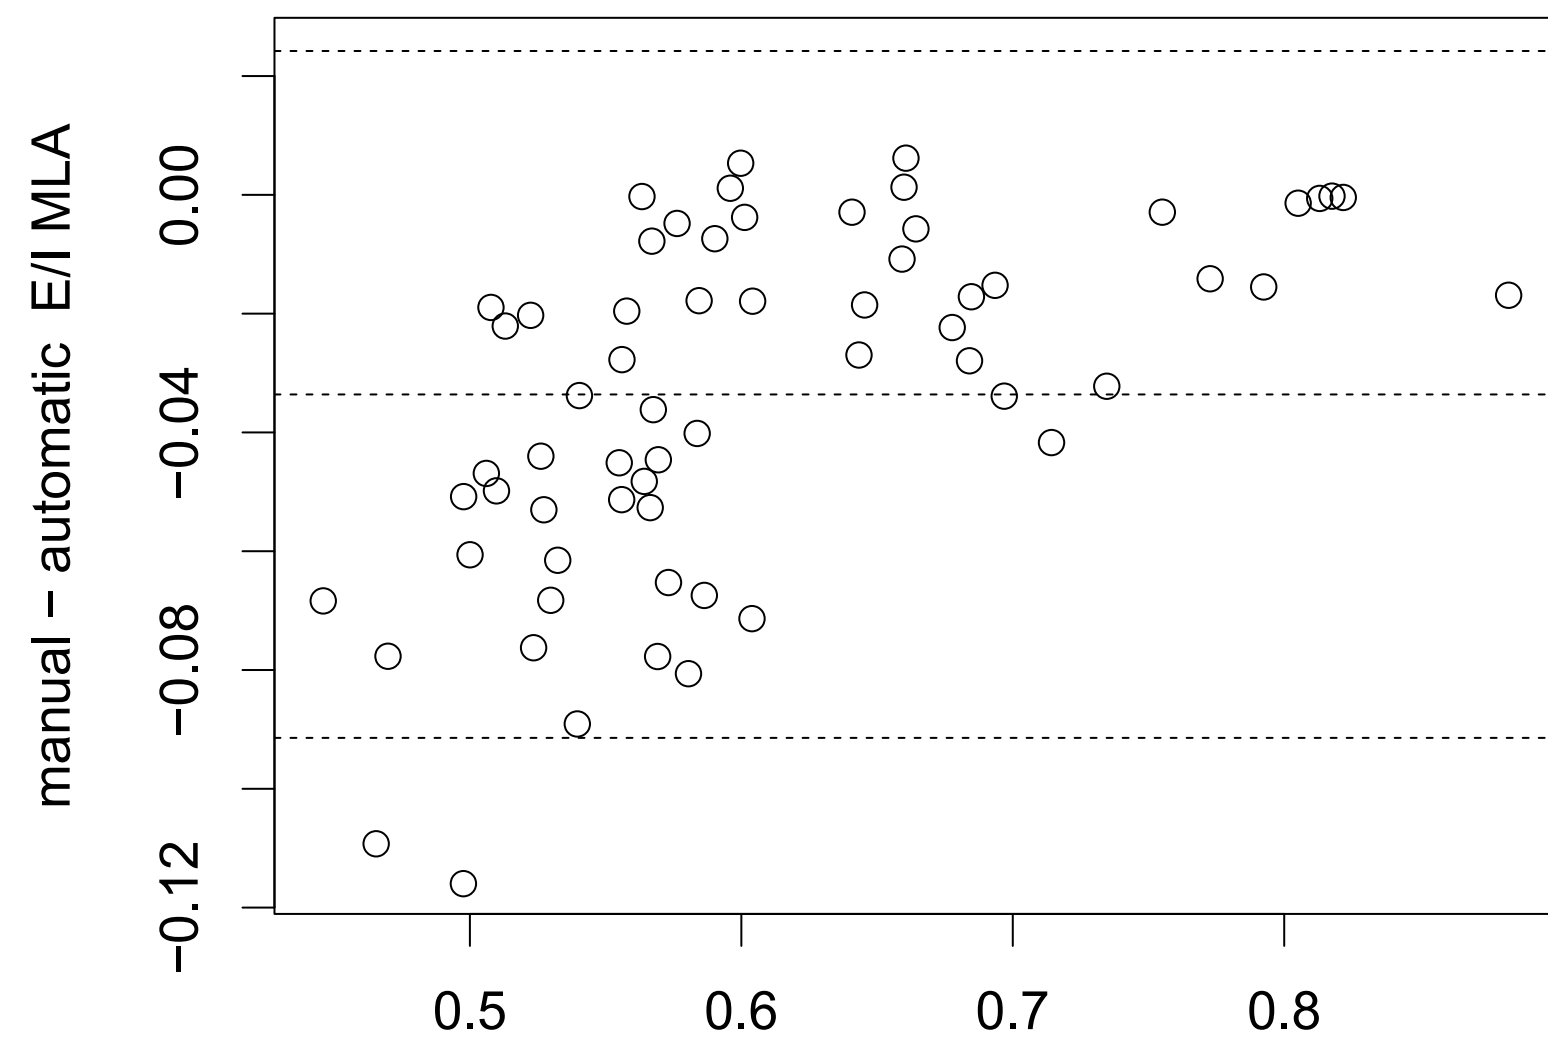

Mean of manual and automatic E/I MLA

**LUL+LLi B30f**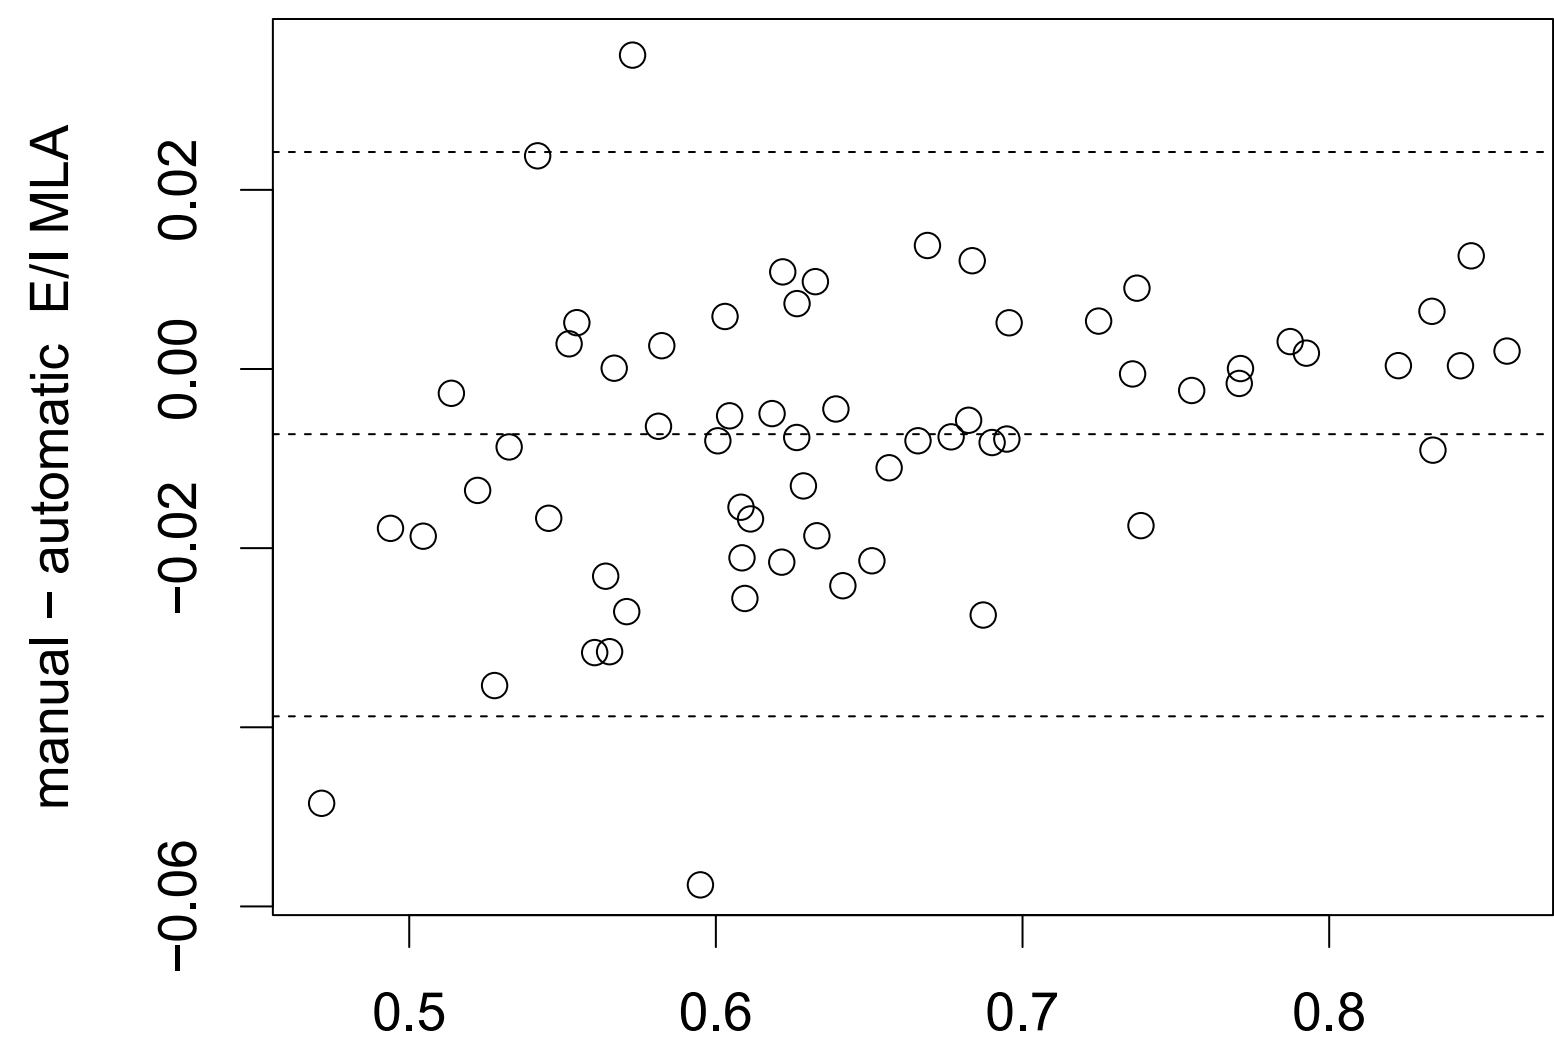

Mean of manual and automatic E/I MLA
