# Supplementary material for: Validation of automated lobe segmentation on paired inspiratory-expiratory chest CT in 8-14 year-old children with cystic fibrosis
Source: PubMed Central journal article supplement (PMC5890971; doi:10.1371/journal.pone.0194557), 2018-04-09
Supplement: pone.0194557.s015.pdf [file pone.0194557.s015.pdf]

**S3 Table. Hausdorff distance of overlap between fully automatic and manually corrected segmentation of lung.**

| Hausdorff distance [mm] |      |      | Baseline    | 3 months  | 12 months  | 24 months | Overall   |
|-------------------------|------|------|-------------|-----------|------------|-----------|-----------|
| <b>RUL</b>              | Insp | B30f | 0.06±0.04   | 0.09±0.06 | 0.09±0.08  | 0.08±0.09 | 0.08±0.07 |
|                         | Insp | B60f | 0.07±0.08   | 0.06±0.05 | 0.41±1.39  | 0.08±0.09 | 0.16±0.7  |
|                         | Exp  | B30f | 1.77±2.42   | 0.79±0.76 | 1.01±0.87  | 0.78±0.84 | 1.09±1.43 |
|                         | Exp  | B60f | 2.81±4.19   | 1.5±2.2   | 1.09±1.15  | 1.24±1.63 | 1.67±2.61 |
| <b>RML</b>              | Insp | B30f | 0.16±0.07   | 0.24±0.12 | 0.2±0.09   | 0.27±0.27 | 0.22±0.16 |
|                         | Insp | B60f | 0.28±0.16   | 0.33±0.15 | 1.84±5.93  | 0.35±0.2  | 0.7±3     |
|                         | Exp  | B30f | 1.97±3.33   | 2.31±4.03 | 5.31±10.89 | 1.04±1.14 | 2.66±6.13 |
|                         | Exp  | B60f | 1.56±1.55   | 5.99±9.69 | 3.76±6.84  | 2.97±6.33 | 3.57±6.8  |
| <b>RLL</b>              | Insp | B30f | 0.05±0.03   | 0.06±0.03 | 0.07±0.05  | 0.08±0.06 | 0.06±0.04 |
|                         | Insp | B60f | 0.11±0.08   | 0.11±0.06 | 0.15±0.11  | 0.09±0.04 | 0.11±0.08 |
|                         | Exp  | B30f | 0.81±0.56   | 0.88±1.02 | 0.97±0.95  | 0.51±0.57 | 0.79±0.81 |
|                         | Exp  | B60f | 1.15±1.39   | 1.62±1.59 | 1.15±1.37  | 1.25±1.88 | 1.29±1.55 |
| <b>LUL</b>              | Insp | B30f | 0.14±0.09   | 0.47±1.05 | 0.25±0.19  | 0.2±0.22  | 0.27±0.55 |
|                         | Insp | B60f | 0.12±0.08   | 0.59±1.17 | 0.52±1.46  | 0.57±1.41 | 0.45±1.16 |
|                         | Exp  | B30f | 3.45±4.23   | 1.6±2.04  | 1.17±1.14  | 1.31±1.43 | 1.88±2.63 |
|                         | Exp  | B60f | 4.31±5.03   | 3.35±5.61 | 3.95±10.39 | 2.53±5.44 | 3.53±6.77 |
| <b>LLi</b>              | Insp | B30f | 0.47±0.43   | 2.38±6.82 | 0.59±0.3   | 0.7±0.5   | 1.04±3.46 |
|                         | Insp | B60f | 0.88±1.35   | 1.68±2.17 | 2.22±6.2   | 2.41±6.89 | 1.79±4.69 |
|                         | Exp  | B30f | 10.88±10.22 | 3.94±5.2  | 3.04±4.82  | 2.02±2.58 | 4.97±7.12 |
|                         | Exp  | B60f | 9.7±10.43   | 7.06±7.69 | 7.54±10.81 | 2.48±3.41 | 6.68±8.77 |
| <b>LLL</b>              | Insp | B30f | 0.06±0.07   | 0.27±0.8  | 0.08±0.12  | 0.09±0.1  | 0.13±0.41 |
|                         | Insp | B60f | 0.24±0.64   | 0.14±0.2  | 0.28±0.71  | 0.23±0.55 | 0.22±0.55 |
|                         | Exp  | B30f | 1.85±1.48   | 1.2±0.94  | 1.01±0.78  | 0.75±0.83 | 1.21±1.1  |
|                         | Exp  | B60f | 2.44±2.95   | 1.68±1.82 | 1.18±1.18  | 0.65±0.68 | 1.49±1.94 |
| <b>LUL+LLi</b>          | Insp | B30f | 0.08±0.1    | 0.4±1.2   | 0.11±0.13  | 0.12±0.15 | 0.18±0.61 |
|                         | Insp | B60f | 0.25±0.53   | 0.21±0.34 | 0.33±0.87  | 0.43±1.21 | 0.3±0.79  |
|                         | Exp  | B30f | 1.89±1.44   | 1.06±0.81 | 1.02±1     | 0.6±0.62  | 1.14±1.1  |
|                         | Exp  | B60f | 2.24±2.22   | 1.3±0.91  | 1.14±1.14  | 0.59±0.62 | 1.32±1.46 |

Overlap calculated by the Hausdorff distance for fully automatic and manually corrected segmentation are given for inspiration (Insp) and expiration (Exp) and each for B30f and B60f kernel at baseline, 3, 12 and 24 months. The last column summarizes all time points. Mean and

standard deviations (mean $\pm$ sd) are separately calculated for the right upper (RUL), middle (RML) and lower lobe (RLL), the left upper lobe (LUL), the lingula (LLi), the left lower lobe (LLL), and also combining left upper lobe and lingula into one lobe (LUL+LLi).
