# Supplementary material for: Validation of automated lobe segmentation on paired inspiratory-expiratory chest CT in 8-14 year-old children with cystic fibrosis
Source: PubMed Central journal article supplement (PMC5890971; doi:10.1371/journal.pone.0194557), 2018-04-09
Supplement: pone.0194557.s016.pdf [file pone.0194557.s016.pdf]

**S4 Table. Overlap comparison for 5 vs. 6 lobes.**

|                                |      | Dice index |           |           |           |           | Jaccard index |           |           |           |           | Hausdorff distance [mm] |           |           |           |           |
|--------------------------------|------|------------|-----------|-----------|-----------|-----------|---------------|-----------|-----------|-----------|-----------|-------------------------|-----------|-----------|-----------|-----------|
|                                |      | Baseline   | 3 months  | 12 months | 24 months | overall   | Baseline      | 3 months  | 12 months | 24 months | overall   | Baseline                | 3 months  | 12 months | 24 months | overall   |
| <b>5 lobes</b>                 |      |            |           |           |           |           |               |           |           |           |           |                         |           |           |           |           |
| Insp                           | B30f | 0.98±0.01  | 0.97±0.03 | 0.98±0.01 | 0.98±0.01 | 0.98±0.02 | 0.96±0.01     | 0.94±0.05 | 0.96±0.02 | 0.95±0.02 | 0.95±0.03 | 0.08±0.03               | 0.13±0.21 | 0.11±0.06 | 0.13±0.08 | 0.13±0.21 |
| Insp                           | B60f | 0.97±0.01  | 0.97±0.01 | 0.96±0.03 | 0.97±0.02 | 0.97±0.02 | 0.94±0.02     | 0.94±0.02 | 0.93±0.06 | 0.94±0.04 | 0.94±0.04 | 0.19±0.23               | 0.3±0.78  | 0.59±1.48 | 0.24±0.4  | 0.3±0.78  |
| Exp                            | B30f | 0.83±0.08  | 0.85±0.08 | 0.86±0.06 | 0.9±0.06  | 0.86±0.07 | 0.71±0.11     | 0.75±0.12 | 0.77±0.1  | 0.82±0.1  | 0.76±0.11 | 1.66±1.24               | 1.38±1.51 | 1.87±2.44 | 0.74±0.55 | 1.38±1.51 |
| Exp                            | B60f | 0.81±0.09  | 0.83±0.08 | 0.86±0.07 | 0.89±0.07 | 0.85±0.08 | 0.7±0.13      | 0.72±0.13 | 0.76±0.11 | 0.81±0.11 | 0.75±0.12 | 2.12±1.54               | 1.89±1.85 | 1.66±1.58 | 1.34±1.84 | 1.89±1.85 |
| <b>6 lobes</b>                 |      |            |           |           |           |           |               |           |           |           |           |                         |           |           |           |           |
| Insp                           | B30f | 0.97±0.02  | 0.96±0.04 | 0.97±0.01 | 0.97±0.01 | 0.97±0.02 | 0.94±0.01     | 0.92±0.07 | 0.94±0.02 | 0.94±0.02 | 0.93±0.04 | 0.16±0.08               | 0.59±1.44 | 0.21±0.09 | 0.24±0.13 | 0.3±0.74  |
| Insp                           | B60f | 0.96±0.03  | 0.95±0.02 | 0.95±0.04 | 0.96±0.03 | 0.96±0.03 | 0.93±0.02     | 0.91±0.03 | 0.91±0.07 | 0.92±0.05 | 0.92±0.05 | 0.28±0.33               | 0.49±0.54 | 0.9±1.78  | 0.62±1.51 | 0.57±1.19 |
| Exp                            | B30f | 0.83±0.08  | 0.83±0.09 | 0.84±0.07 | 0.88±0.07 | 0.83±0.08 | 0.66±0.12     | 0.72±0.13 | 0.74±0.1  | 0.79±0.11 | 0.72±0.12 | 3.46±2.54               | 1.79±1.42 | 2.11±2.34 | 1.07±0.87 | 2.11±2.06 |
| Exp                            | B60f | 0.81±0.1   | 0.79±0.09 | 0.83±0.09 | 0.86±0.09 | 0.81±0.1  | 0.64±0.15     | 0.66±0.12 | 0.72±0.12 | 0.76±0.13 | 0.7±0.14  | 3.76±2.97               | 3.53±2.86 | 3.11±2.81 | 1.85±2.02 | 3.06±2.73 |
| <b>relative difference [%]</b> |      |            |           |           |           |           |               |           |           |           |           |                         |           |           |           |           |
| Insp                           | B30f | 1.02       | 1.03      | 1.02      | 1.02      | 1.02      | 2.08          | 2.13      | 2.08      | 1.05      | 2.11      | 100.00                  | 353.85    | 90.91     | 84.62     | 130.77    |
| Insp                           | B60f | 1.03       | 2.06      | 1.04      | 1.03      | 1.03      | 1.06          | 3.19      | 2.15      | 2.13      | 2.13      | 47.37                   | 63.33     | 52.54     | 158.33    | 90.00     |
| Exp                            | B30f | 0.00       | 2.35      | 2.33      | 2.22      | 3.49      | 7.04          | 4.00      | 3.90      | 3.66      | 5.26      | 108.43                  | 29.71     | 12.83     | 44.59     | 52.90     |
| Exp                            | B60f | 0.00       | 4.82      | 3.49      | 3.37      | 4.71      | 8.57          | 8.33      | 5.26      | 6.17      | 6.67      | 77.36                   | 86.77     | 87.35     | 38.06     | 61.90     |

The indices of overlap summarized for 5 and 6 lobes at baseline, 3, 12 and 24 month. Mean and standard deviation (mean±sd) are given for inspiration (Insp) and expiration (Exp) and each for B30f and B60f kernel. When treating LUL and LLI as a combined lobe (LUL+LLi, 5 lobes), the results were somewhat better than for separate analysis (LUL and LLI; 6 lobes), which is mainly due to the missing fissure, i.e. unequivocal separation, between both lobes. The relative difference between the two approaches are calculated as relative difference in [%].
