# Supplementary material for: Validation of automated lobe segmentation on paired inspiratory-expiratory chest CT in 8-14 year-old children with cystic fibrosis
Source: PubMed Central journal article supplement (PMC5890971; doi:10.1371/journal.pone.0194557), 2018-04-09
Supplement: pone.0194557.s018.pdf [file pone.0194557.s018.pdf]

**S6 Table. Lobe volume determination on manual and automatic segmentation maps (Inspiration B60f scans).**

|                |                                      | <b>Baseline</b> | <b>3 months</b>   | <b>12 months</b>  | <b>24 months</b> | <b>Overall</b>    |
|----------------|--------------------------------------|-----------------|-------------------|-------------------|------------------|-------------------|
| <b>RUL</b>     | <b>manually corrected (mean±sd)</b>  | 631.25±170      | 621.15±201.76     | 697.69±215.55     | 766.95±247.23    | 677.87±212.82     |
|                | <b>automatic (mean±sd)</b>           | 640.28±169.4    | 630.6±203.98      | 731.1±221.37      | 781.7±249.71     | 694.56±216.66     |
|                | <b>Δ (mean±sd)</b>                   | -9.03±15.07     | -9.44±13.88       | -33.41±89.1       | -14.75±20.81     | -16.69±47.13      |
|                | <b>LoA (2.5% limit, 97.5% limit)</b> | (-38.56, 20.5)  | (-36.64, 17.76)   | (-208.04, 141.22) | (-55.54, 26.03)  | (-109.07, 75.69)  |
|                | <b>Regr. (Intercept / Slope)</b>     | 3.74 / 1        | 10.8 / 0.99       | -4.92 / 1.02      | -4.31 / 1.02     | 5.2 / 1.01        |
|                | <b>Regr (Pearson's r)</b>            | 1               | 1                 | 0.92              | 1                | 0.98              |
| <b>RML</b>     | <b>manually corrected (mean±sd)</b>  | 280.37±88.01    | 290.97±101.93     | 312.9±107.3       | 347.02±121.1     | 307.19±105.5      |
|                | <b>automatic (mean±sd)</b>           | 295.79±83.11    | 308.67±101.28     | 301.93±115.2      | 355.28±116.74    | 314.78±104.8      |
|                | <b>Δ (mean±sd)</b>                   | -15.42±24.36    | -17.69±21         | 10.97±70.83       | -8.26±24.53      | -7.59±41.61       |
|                | <b>LoA (2.5% limit, 97.5% limit)</b> | (-63.18, 32.33) | (-58.86, 23.47)   | (-127.85, 149.8)  | (-56.33, 39.81)  | (-89.14, 73.96)   |
|                | <b>Regr. (Intercept / Slope)</b>     | 13.6 / 1.02     | 15.66 / 1         | 10.77 / 0.97      | 18.02 / 1        | 18 / 0.99         |
|                | <b>Regr (Pearson's r)</b>            | 0.96            | 0.98              | 0.8               | 0.98             | 0.92              |
| <b>RLL</b>     | <b>manually corrected (mean±sd)</b>  | 1004.11±256.21  | 1012.47±278.4     | 1093.3±342.33     | 1258.97±347.37   | 1089.57±317.17    |
|                | <b>automatic (mean±sd)</b>           | 971.58±262.51   | 980.52±282.67     | 1069.1±351.03     | 1231.55±343.42   | 1060.52±321.3     |
|                | <b>Δ (mean±sd)</b>                   | 32.53±20.72     | 31.95±16.12       | 24.2±34.49        | 27.41±21.07      | 29.05±23.81       |
|                | <b>LoA (2.5% limit, 97.5% limit)</b> | (-8.08, 73.14)  | (0.35, 63.56)     | (-43.41, 91.81)   | (-13.87, 68.7)   | (-17.62, 75.72)   |
|                | <b>Regr. (Intercept / Slope)</b>     | -52.07 / 1.02   | -39.89 / 1.01     | -46.35 / 1.02     | -16.18 / 0.99    | -41.29 / 1.01     |
|                | <b>Regr (Pearson's r)</b>            | 1               | 1                 | 1                 | 1                | 1                 |
| <b>LUL</b>     | <b>manually corrected (mean±sd)</b>  | 524.17±154.27   | 540.69±189.64     | 587.29±189.19     | 666.04±215.9     | 578.17±191.44     |
|                | <b>automatic (mean±sd)</b>           | 513.2±143.31    | 533.47±219.93     | 596.69±197.64     | 648.76±211.28    | 571.83±197.64     |
|                | <b>Δ (mean±sd)</b>                   | 10.98±23.06     | 7.22±85.69        | -9.41±76.56       | 17.29±47.43      | 6.35±62.69        |
|                | <b>LoA (2.5% limit, 97.5% limit)</b> | (-34.23, 56.18) | (-160.74, 175.18) | (-159.46, 140.65) | (-75.67, 110.24) | (-116.52, 129.22) |
|                | <b>Regr. (Intercept / Slope)</b>     | 39.53 / 0.91    | -33.56 / 1.03     | -18.04 / 1.02     | 32.41 / 0.92     | 3.8 / 0.97        |
|                | <b>Regr (Pearson's r)</b>            | 0.99            | 0.92              | 0.92              | 0.98             | 0.95              |
| <b>LLi</b>     | <b>manually corrected (mean±sd)</b>  | 231.69±57.6     | 234.35±64.07      | 257.01±80.17      | 282.54±79.43     | 250.9±72.06       |
|                | <b>automatic (mean±sd)</b>           | 240.24±73.41    | 227.29±87.2       | 265.09±90.12      | 299.89±106.19    | 257.47±91.74      |
|                | <b>Δ (mean±sd)</b>                   | -8.55±33.51     | 7.05±102.97       | -8.08±42.5        | -17.35±49.5      | -6.56±62.49       |
|                | <b>LoA (2.5% limit, 97.5% limit)</b> | (-74.22, 57.12) | (-194.77, 208.88) | (-91.38, 75.21)   | (-114.36, 79.66) | (-129.04, 115.91) |
|                | <b>Regr. (Intercept / Slope)</b>     | -21.65 / 1.15   | -130.2 / 1.63     | -5.63 / 1.08      | -17.54 / 1.16    | -19.17 / 1.16     |
|                | <b>Regr (Pearson's r)</b>            | 0.9             | 0.1               | 0.88              | 0.9              | 0.73              |
| <b>LLL</b>     | <b>manually corrected (mean±sd)</b>  | 937.2±256.48    | 943.4±287.15      | 1024.62±344       | 1184.09±348.61   | 1019.76±318.96    |
|                | <b>automatic (mean±sd)</b>           | 936.79±266.6    | 953.69±294.27     | 1004.83±360.68    | 1178.43±351.58   | 1015.9±326.44     |
|                | <b>Δ (mean±sd)</b>                   | 0.41±26.45      | -10.29±41.03      | 19.79±82.69       | 5.66±16.66       | 3.86±49.14        |
|                | <b>LoA (2.5% limit, 97.5% limit)</b> | (-51.42, 52.24) | (-90.72, 70.13)   | (-142.29, 181.86) | (-26.99, 38.32)  | (-92.45, 100.17)  |
|                | <b>Regr. (Intercept / Slope)</b>     | -35.79 / 1.04   | -24.57 / 1.03     | -27.02 / 1.02     | -23.4 / 1.01     | -23.78 / 1.02     |
|                | <b>Regr (Pearson's r)</b>            | 1               | 0.99              | 0.97              | 1                | 0.99              |
| <b>LUL+LLi</b> | <b>manually corrected (mean±sd)</b>  | 755.86±196.66   | 775.04±244.49     | 844.29±254.97     | 948.59±284.48    | 829.08±251.94     |
|                | <b>automatic (mean±sd)</b>           | 753.44±185.25   | 760.76±243.53     | 861.78±243.42     | 948.65±278.5     | 829.29±246.81     |
|                | <b>Δ (mean±sd)</b>                   | 2.42±26.82      | 14.28±40.63       | -17.49±82.39      | -0.06±18.42      | -0.22±49.25       |
|                | <b>LoA (2.5% limit, 97.5% limit)</b> | (-50.14, 54.98) | (-65.36, 93.91)   | (-178.98, 143.99) | (-36.17, 36.04)  | (-96.74, 96.31)   |
|                | <b>Regr. (Intercept / Slope)</b>     | 36.04 / 0.95    | 13.2 / 0.98       | 19.44 / 0.97      | 30.2 / 0.97      | 21.61 / 0.97      |
|                | <b>Regr (Pearson's r)</b>            | 0.99            | 0.99              | 0.95              | 1                | 0.98              |

Lobar volumes [cm<sup>3</sup>] calculated for fully automatic and manually corrected segmentation on inspiration B60f scans at baseline, 3, 12 and 24 months.

The last column summarizes all time points. All values are separately calculated for the right upper (RUL), middle (RML) and lower lobe (RLL), the left upper lobe (LUL), the lingula (LLi), the left lower lobe (LLL), and also combining left upper lobe and lingula into one lobe (LUL+LLi). Both

methods are compared in accordance with the approach of Bland-Altman giving mean differences ( $\Delta$ ), limits of agreement (LoA) and two regression coefficients (Intercept / Slope and Pearson's correlation coefficient).
